# Supplementary material for: ECCO version 4: an integrated framework for non-linear inverse modeling and global ocean state estimation
Source: Copernicus journal article supplement (doi:10.5194/gmd-8-3071-2015), 2015-10-06
Supplement: Supplementary file 1 [file gmd-8-3071-2015-supplement.pdf]

Supplement of Geosci. Model Dev., 8, 3071–3104, 2015  
<http://www.geosci-model-dev.net/8/3071/2015/>  
doi:10.5194/gmd-8-3071-2015-supplement  
© Author(s) 2015. CC Attribution 3.0 License.

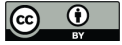

*Supplement of*

## **ECCO version 4: an integrated framework for non-linear inverse modeling and global ocean state estimation**

**G. Forget et al.**

*Correspondence to:* G. Forget (gforget@mit.edu)

The copyright of individual parts of the supplement might differ from the CC-BY 3.0 licence.

# Standard analysis for ECCO v4, release 1 state estimate.

September 28, 2015

# Table of contents

## README

### fit to data

- fit to in situ data
- fit to altimeter data (RADS)
- fit to sst data
- fit to grace r4 data
- fit to seaice data

### volume, heat and salt transports

- barotropic streamfunction
- meridional streamfunction
- meridional streamfunction (time series)
- meridional heat transport
- meridional freshwater transport
- meridional salt transport
- meridional transports (time series)
- transects transport

### mean and variance maps

- sea surface height
- 3D state variables
- air-sea heat flux
- air-sea freshwater flux
- surface wind stress

### global, zonal, regional averages

- zonal mean tendencies
- equatorial sections
- global mean properties
- zonal mean properties
- zonal mean properties (surface)
- seaice time series

budgets : volume, heat and salt (top to bottom)

budgets : volume, heat and salt (100m to bottom)

mixed layer depth fields

# README

## Depicted solution :

- name: ECCO v4, release 1 state estimate (1992–2011)
- source : Gaël Forget (MIT/AER/JPL ECCO group)
- reference : Forget et al., 2015 (doi:10.5194/gmdd-8-3653-2015)
- contact : ecco-support@mit.edu

## Solution history :

- r4it11 : reduce background vertical viscosity (GF)
- r4it10 : cleanup control vector adjustments (GF)
- r4it9 : optimization of global mean sea level alone (GF)
- r4it0-8 : full adjoint iterations, omitting global mean sea level altimetry constraint (GF)

## Release history :

- 2014/02/04 : initial release of ECCO v4, release 1 (GF)
  - domain decomposed in 90x90 tiles (13 of them)
  - CF-1.6 ncetcdf files (using write write\_nctiles.m)



# fit to in situ data

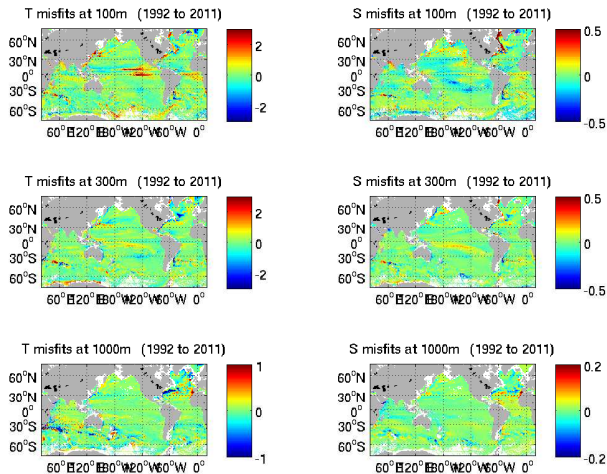

Figure : Time mean misfit (model-data) for in situ profiles, at various depths (rows), for T (left; in K) and S (right; in psu).

# fit to in situ data

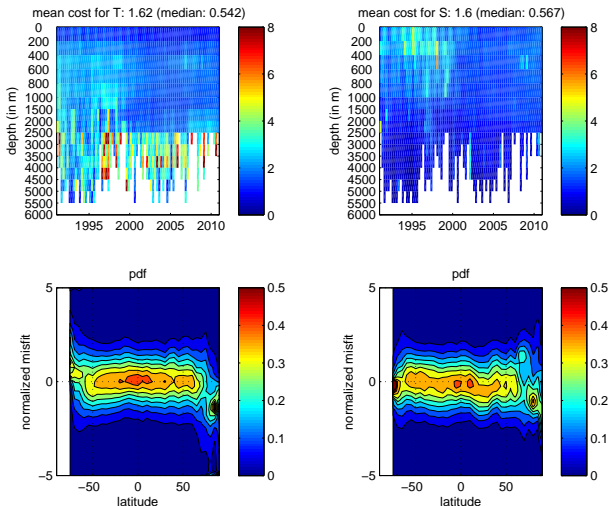

Figure : Cost function (top) for in situ profiles, as a function of depth and time. Distribution of normalized misfits (bottom) as a function of latitude. For T (left) and S (right).

# fit to in situ data

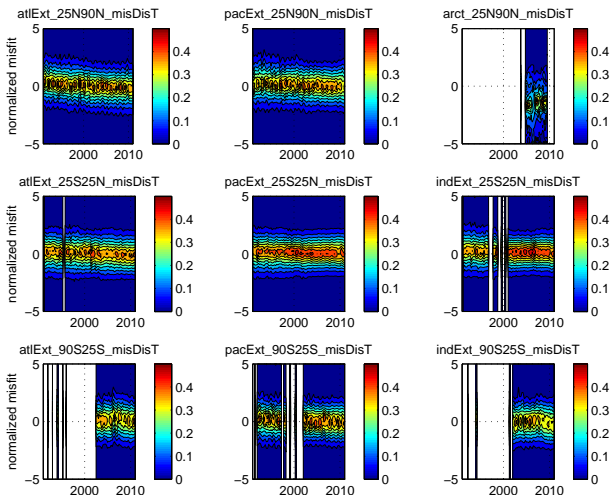

Figure : Distribution of normalized misfits per basin (panel) as a function of latitude, for T

# fit to in situ data

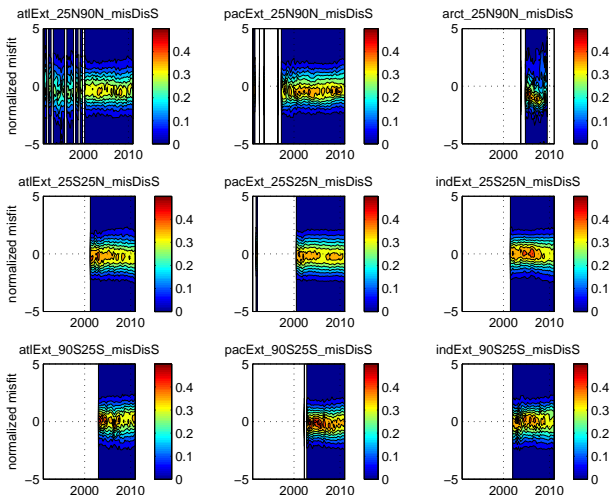

Figure : Distribution of normalized misfits per basin (panel) as a function of latitude, for S

# fit to altimeter data (RADS)

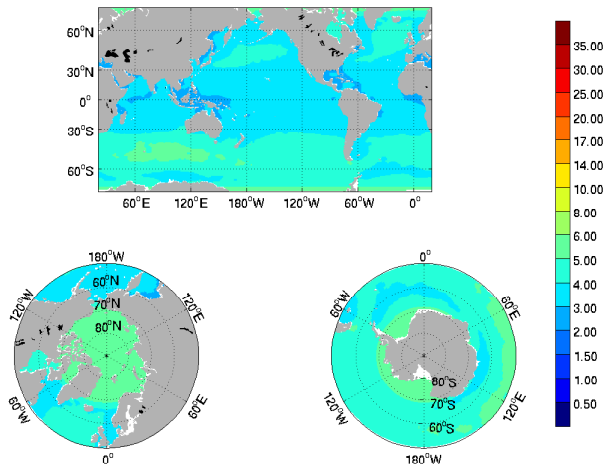

Figure : mean dynamic topography prior uncertainty (cm)

# fit to altimeter data (RADS)

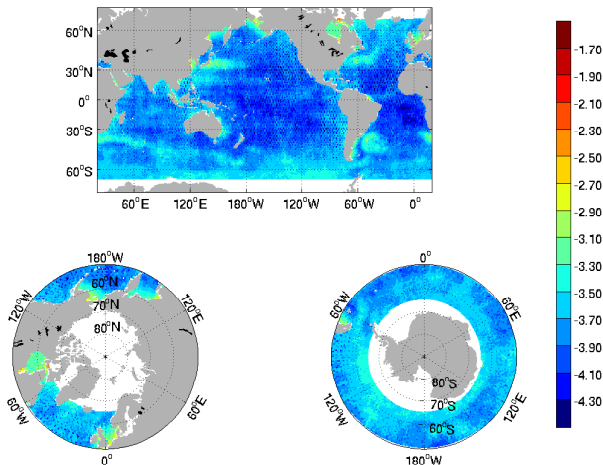

Figure : log(prior error variance) – sea level anomaly (m<sup>2</sup>) – large space/time scales

# fit to altimeter data (RADS)

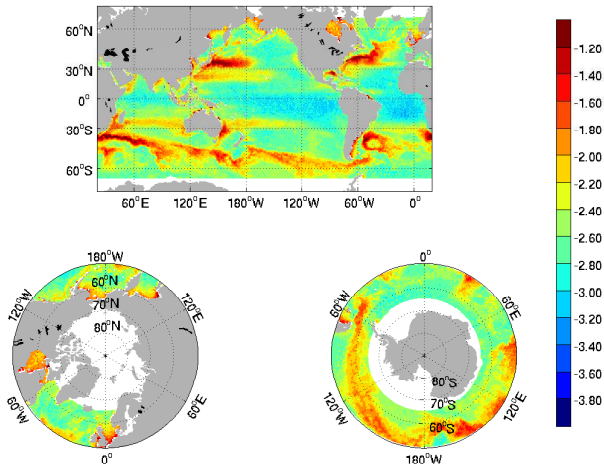

Figure : log(prior error variance) – sea level anomaly ( $m^2$ ) – pointwise

# fit to altimeter data (RADS)

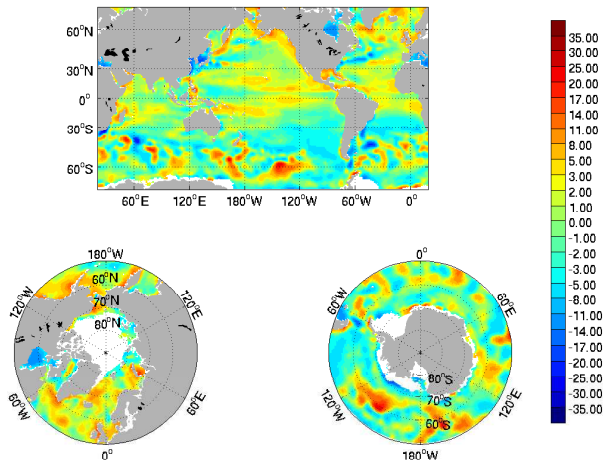

Figure : mean dynamic topography misfit (cm)



# fit to altimeter data (RADS)

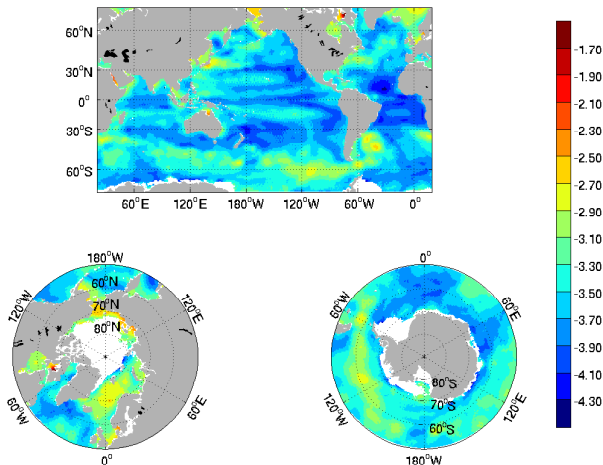

Figure : modeled-observed log(variance) - sea level anomaly (m<sup>2</sup>)  
- large space/time scales

# fit to altimeter data (RADS)

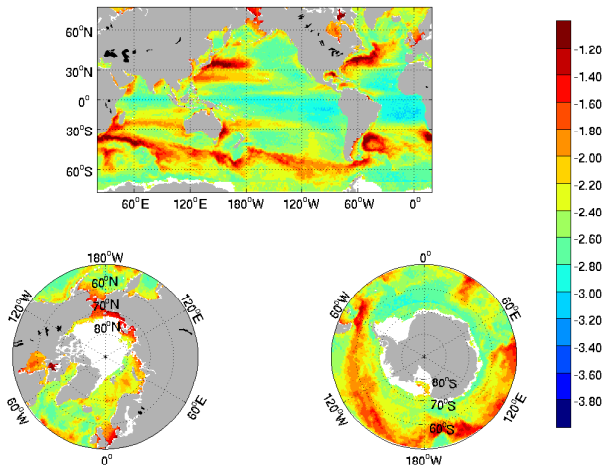

Figure : modeled-observed log(variance) – sea level anomaly (m<sup>2</sup>)  
– pointwise

# fit to altimeter data (RADS)

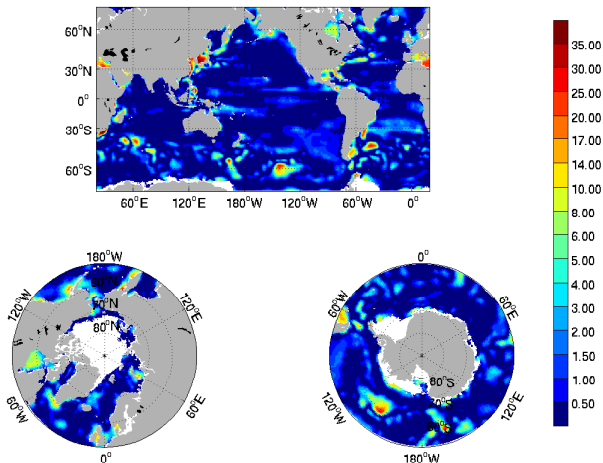

Figure : modeled-observed cost – mean dynamic topography

# fit to altimeter data (RADS)

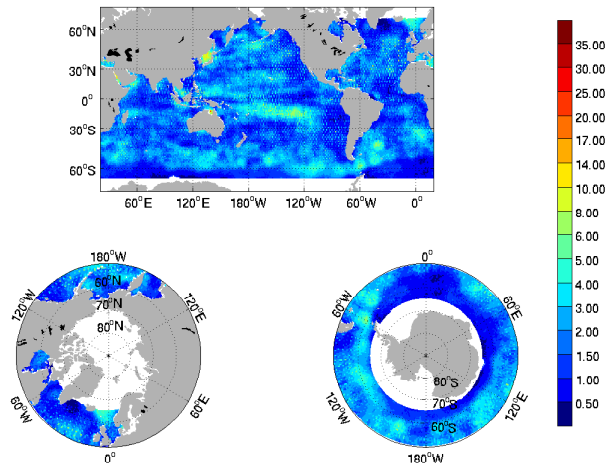

Figure : modeled-observed cost – sea level anomaly  
– large space/time scales

# fit to altimeter data (RADS)

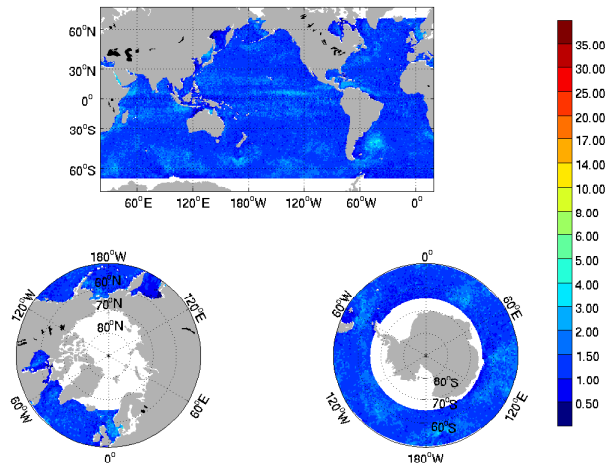

Figure : modeled-observed cost – sea level anomaly – pointwise

# fit to altimeter data (RADS)

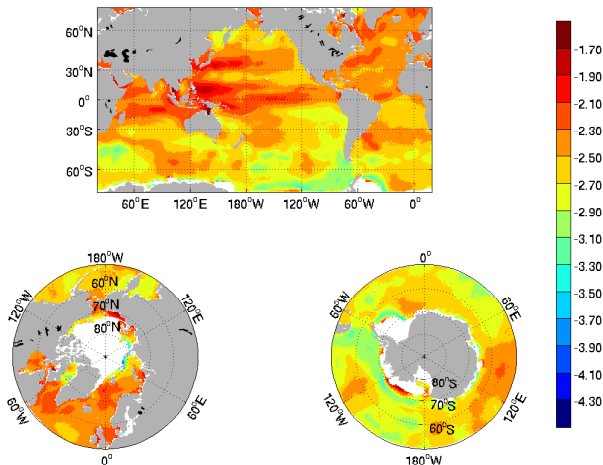

Figure : observed log(variance) – sea level anomaly (m<sup>2</sup>) – large space/time scales

# fit to altimeter data (RADS)

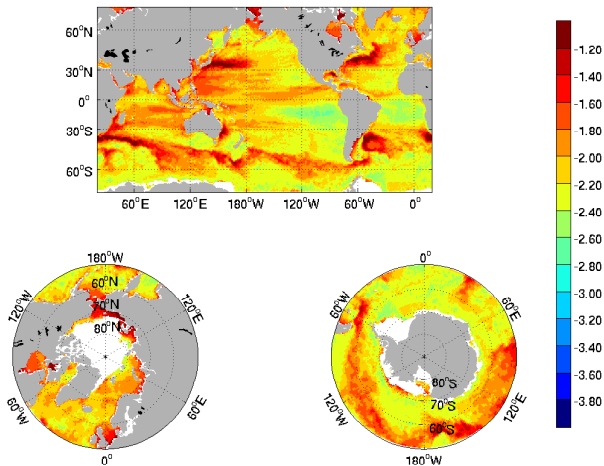

Figure : observed log(variance) - sea level anomaly (m<sup>2</sup>) - pointwise

# fit to altimeter data (RADS)

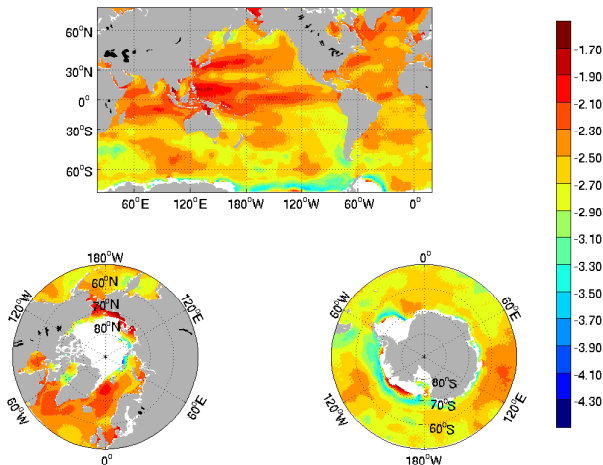

Figure : modeled log(variance) - sea level anomaly (m<sup>2</sup>) - large space/time scales



# fit to altimeter data (RADS)

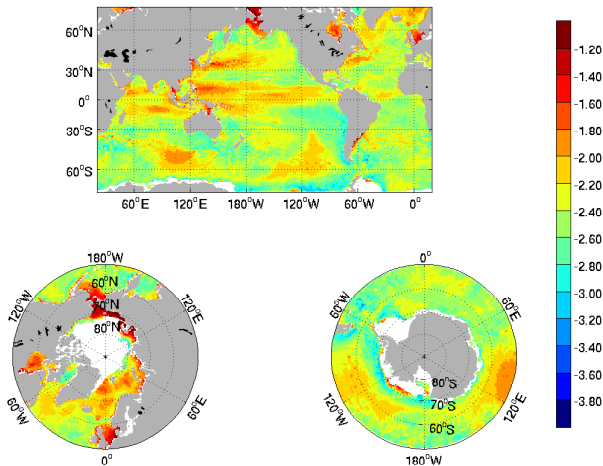

Figure : modeled log(variance) – sea level anomaly (m<sup>2</sup>) – pointwise

# fit to sst data

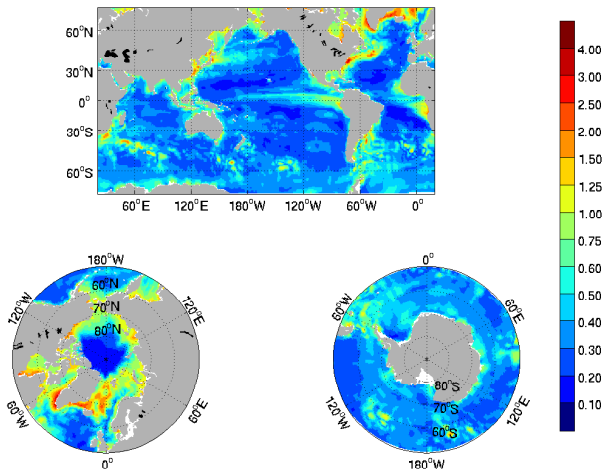

Figure : modeled-Reynolds rms – sea surface temperature (K)

# fit to sst data

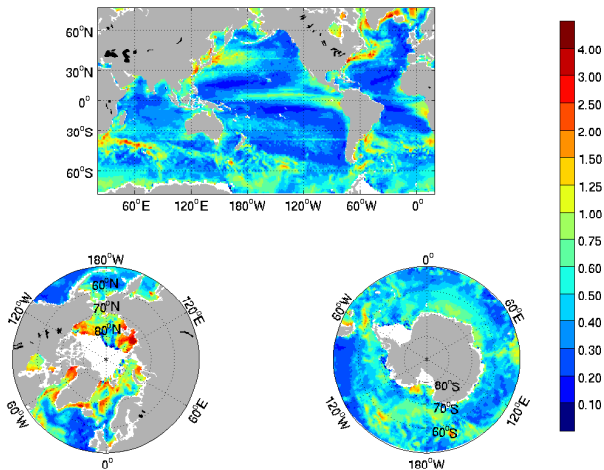

Figure : modeled-REMSS rms – sea surface temperature (K)

# fit to sst data

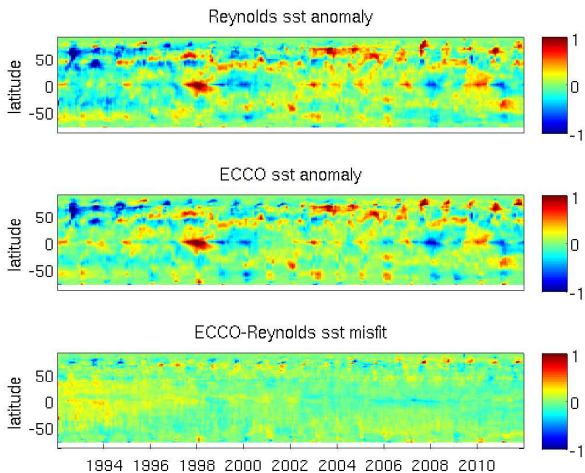

Figure : ECCO and Reynolds zonal mean sst anomalies (K)

# fit to sst data

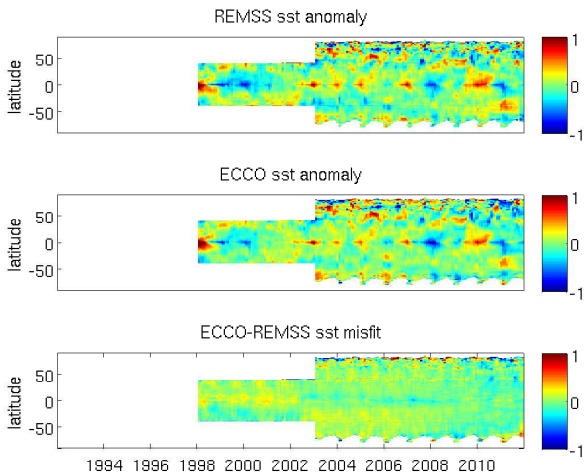

Figure : ECCO and REMSS zonal mean sst anomalies (K)

# fit to grace r4 data

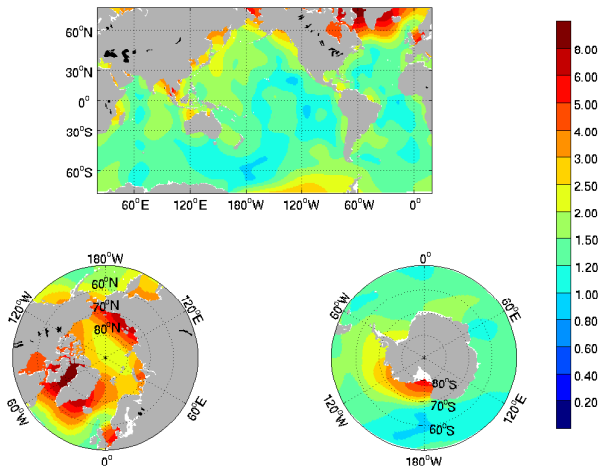

Figure : modeled-observed rms – bottom pressure (cm)

# fit to grace r4 data

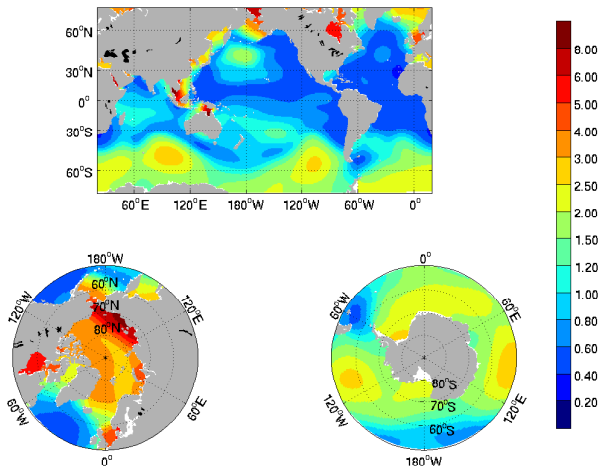

Figure : rms modeled – bottom pressure (cm)

# fit to grace r4 data

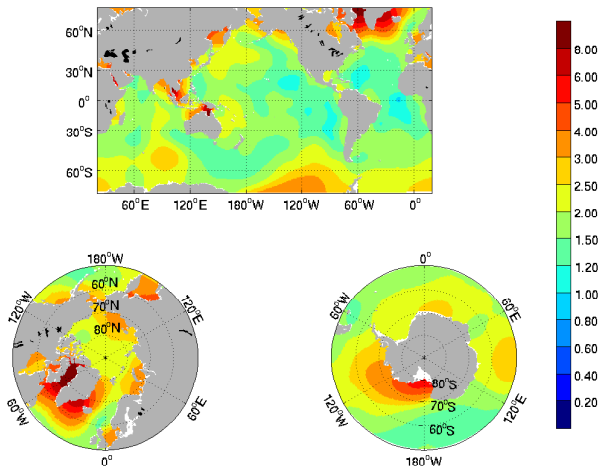

Figure : rms observed – bottom pressure (cm)



# fit to grace r4 data

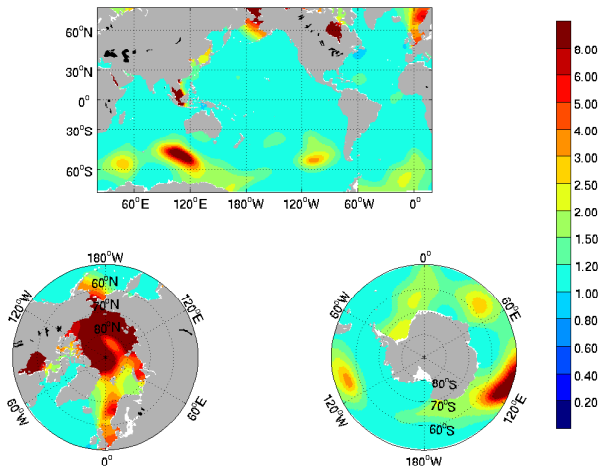

Figure : Cost function

# fit to seaice data

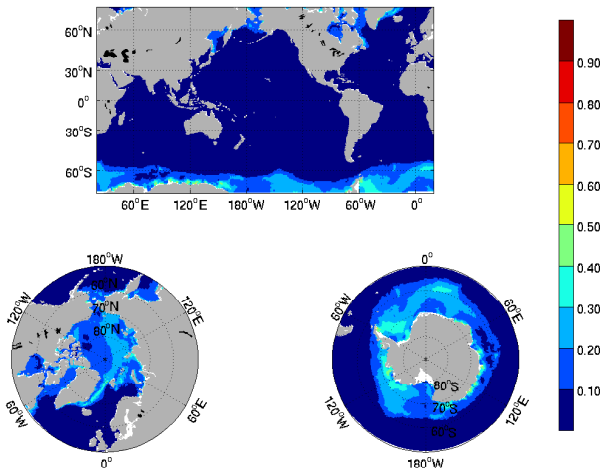

Figure : modeled-observed rms – sea ice concentration

# fit to seaice data

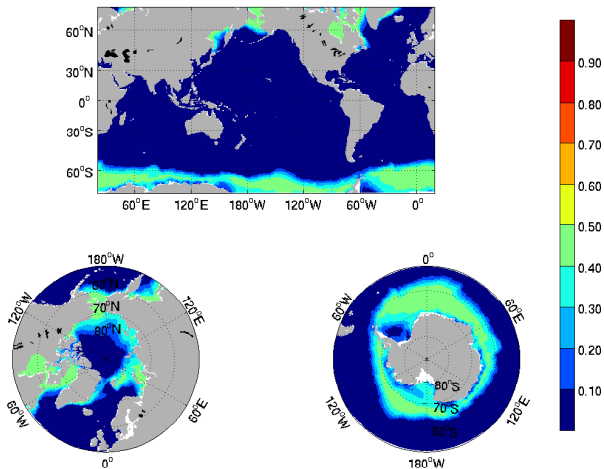

Figure : observed std – sea ice concentration

# fit to seaice data

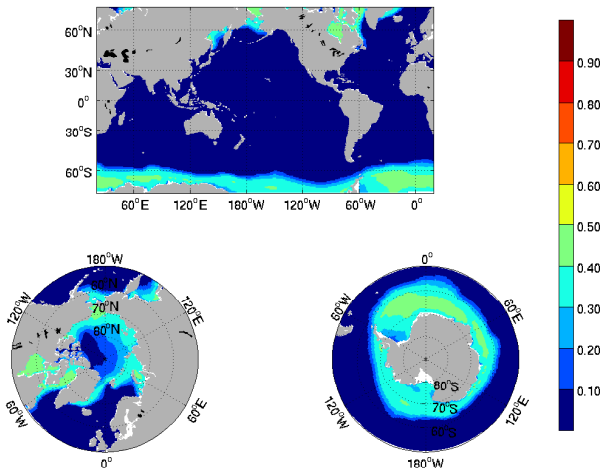

Figure : modelled std – sea ice concentration

# fit to seaice data

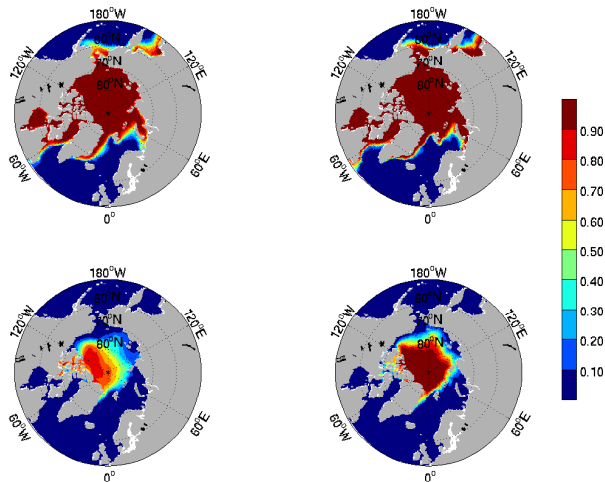

Figure : ECCO (left) and NSIDC (right, gsfc bootstrap) ice concentration in March (top) and September (bottom).

# fit to seaice data

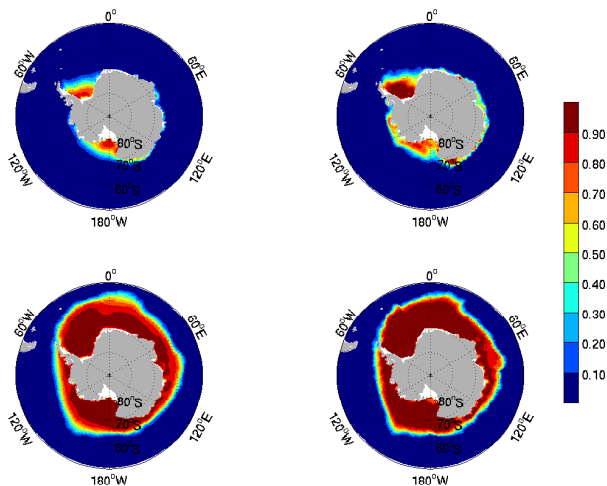

Figure : ECCO (left) and NSIDC (right, gsfc bootstrap) ice concentration in March (top) and September (bottom).

# fit to seaice data

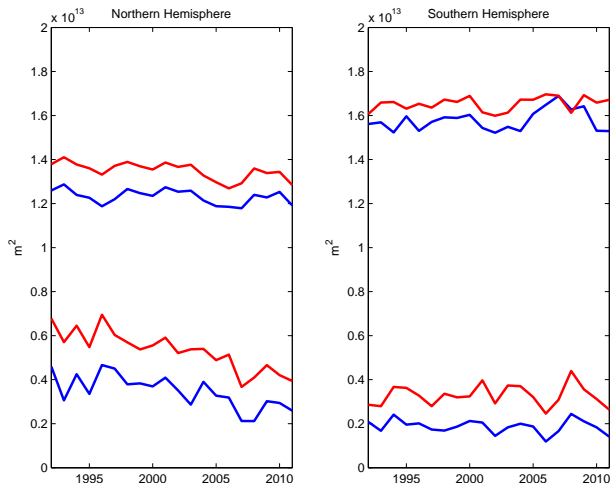

Figure : ECCO (blue) and NSIDC (red, gsfc bootstrap) ice concentration in March and September in Northern Hemisphere (left) and Southern Hemisphere (right)

# fit to seaice data

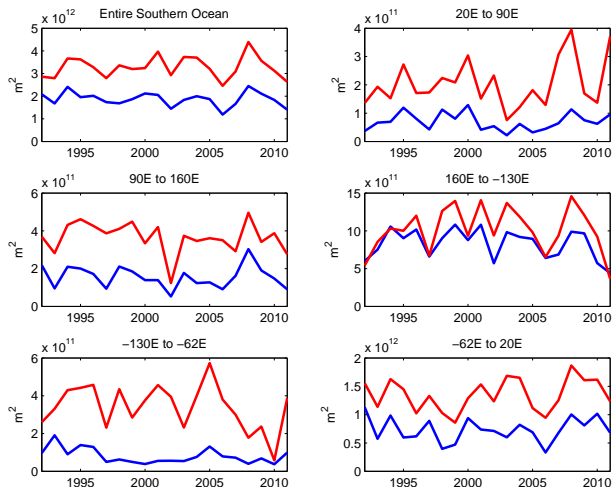

Figure : ECCO (blue) and NSIDC (red, gsfc bootstrap) ice concentration in March per Southern Ocean sector



# fit to seaice data

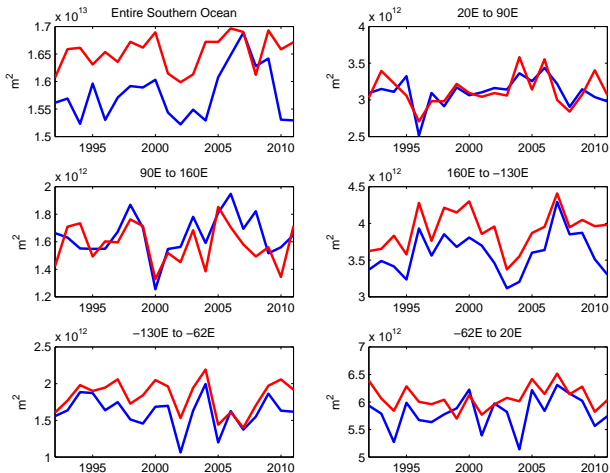

Figure : ECCO (blue) and NSIDC (red, gsfc bootstrap) ice concentration in September per Southern Ocean sector

# barotropic streamfunction

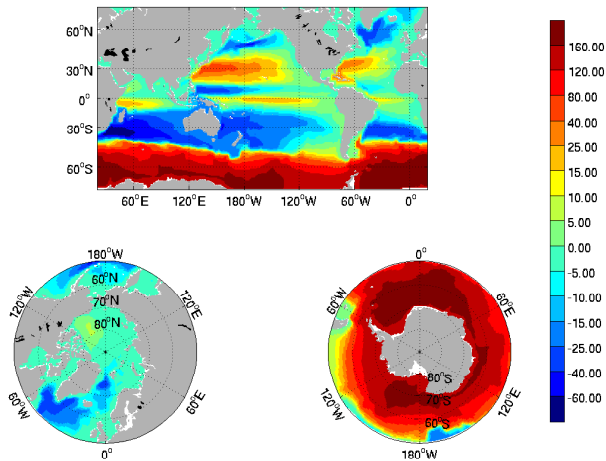

Figure : 1992-2011 mean – barotropic streamfunction (Sv)

# barotropic streamfunction

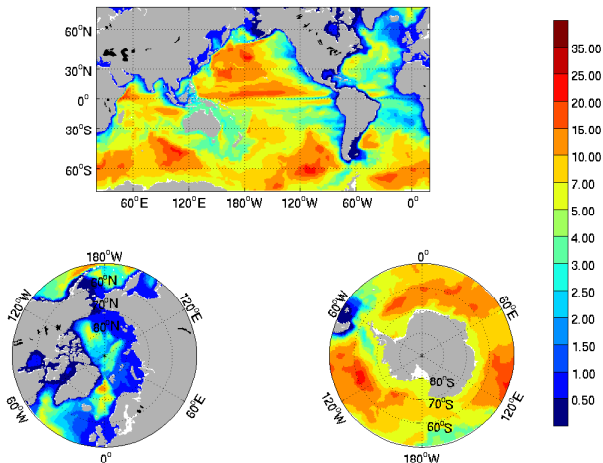

Figure : 1992-2011 standard deviation – barotropic streamfunction (Sv)

# meridional streamfunction

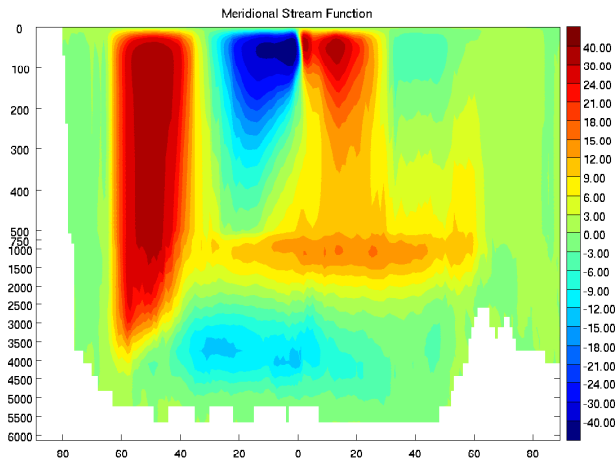

Figure : 1992-2011 mean – overturning streamfunction (Sv)

# meridional streamfunction

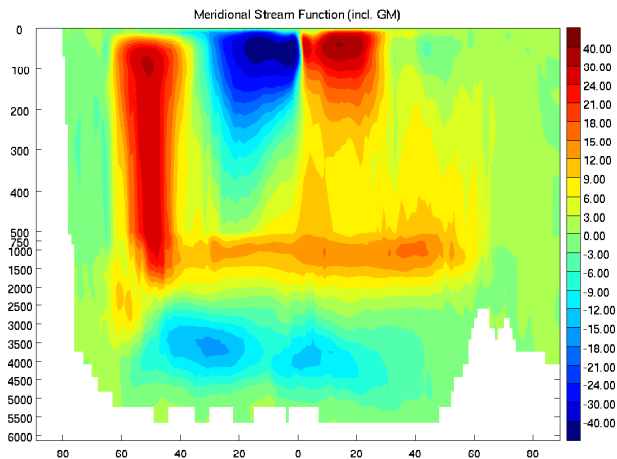

Figure : 1992-2011 mean – overturning streamfunction incl. GM (Sv)

# meridional streamfunction

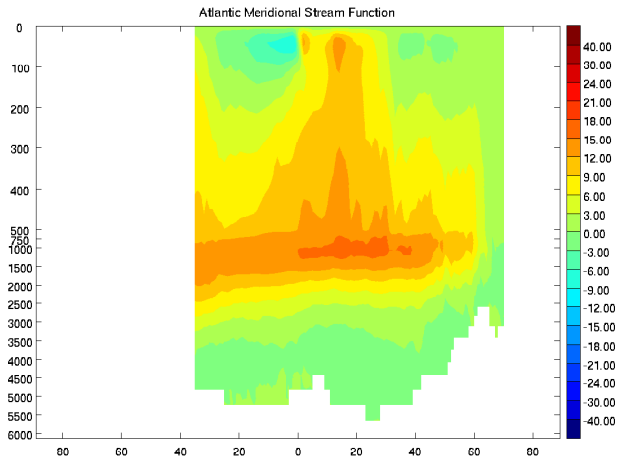

Figure : 1992-2011 mean – Atlantic overturning streamfunction (Sv)

# meridional streamfunction

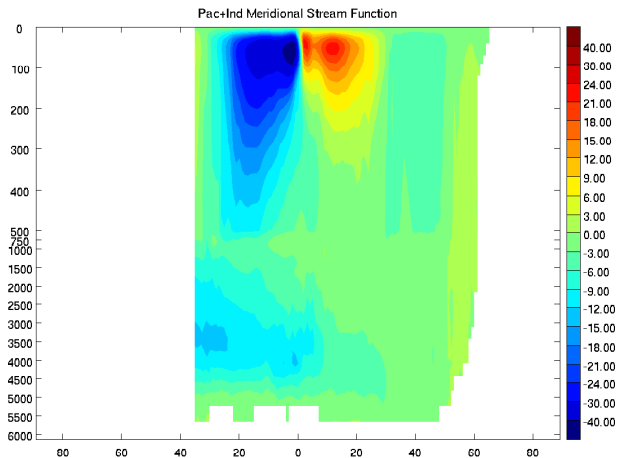

Figure : 1992-2011 mean – Pac+Ind overturning streamfunction (Sv)

# meridional streamfunction

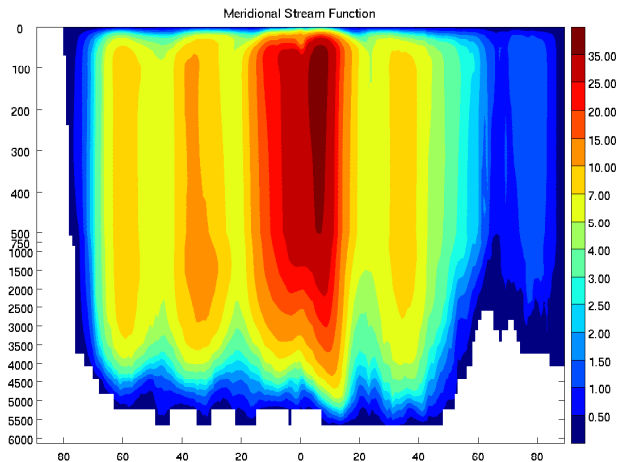

Figure : 1992-2011 standard deviation – overturning streamfunction (Sv)



# meridional streamfunction

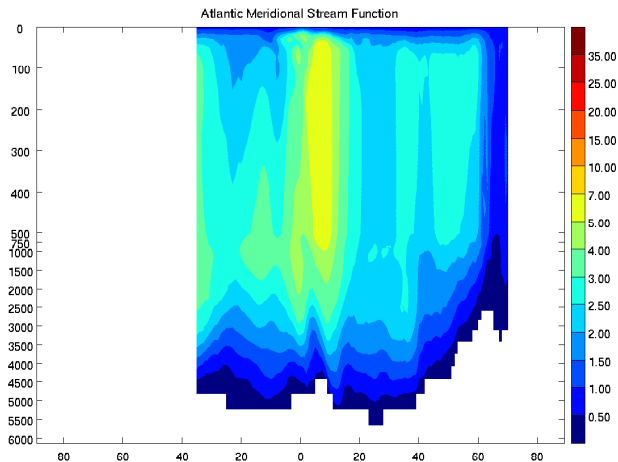

Figure : 1992-2011 standard deviation – Atlantic overturning streamfunction (Sv)

# meridional streamfunction (time series)

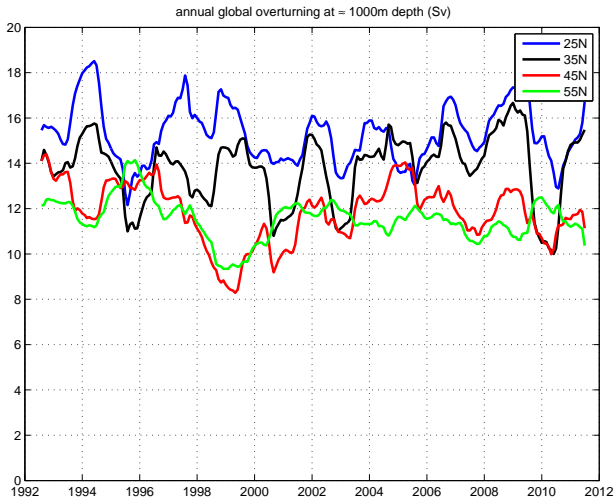

Figure : annual global overturning at select latitudes at  $\approx 1000\text{m}$  depth

# meridional streamfunction (time series)

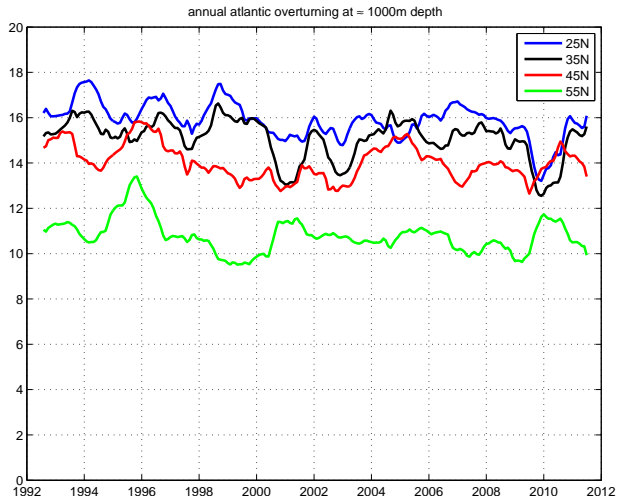

Figure : annual Atlantic overturning at select latitudes at  $\approx 1000\text{m}$  depth (Sv)

# meridional heat transport

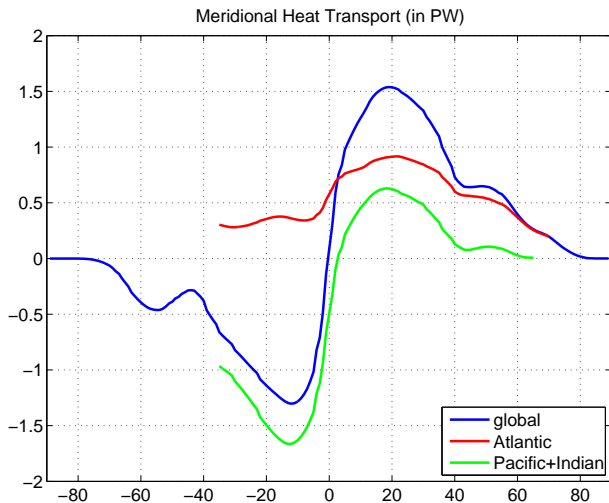

Figure : 1992-2011 mean – meridional heat transport (PW)

# meridional heat transport

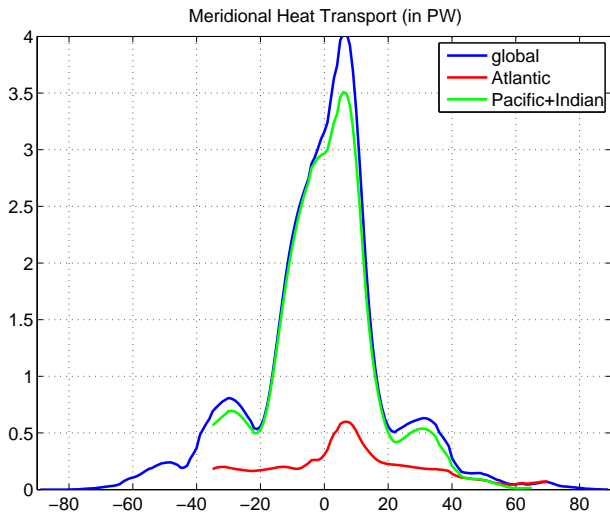

Figure : 1992-2011 standard deviation – meridional heat transport (PW)

# meridional freshwater transport

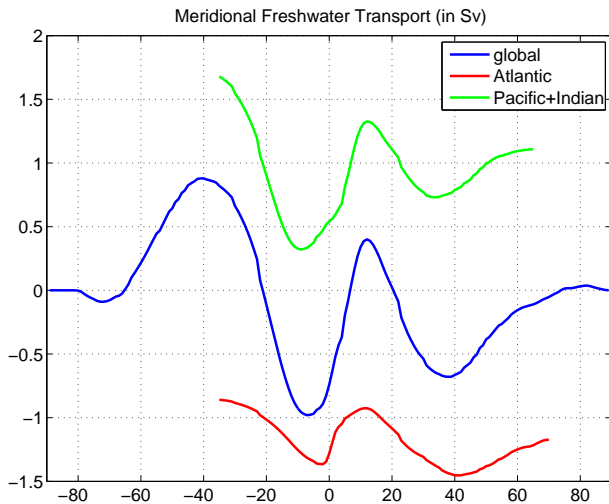

Figure : 1992-2011 mean – meridional freshwater transport (Sv)

# meridional freshwater transport

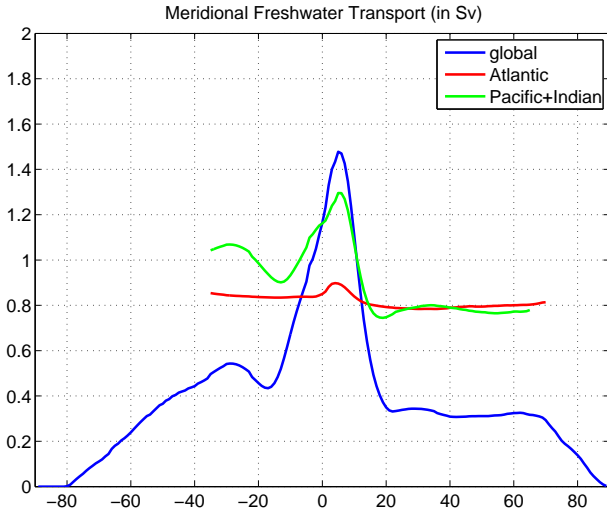

Figure : 1992-2011 standard deviation – meridional freshwater transport (Sv)

# meridional salt transport

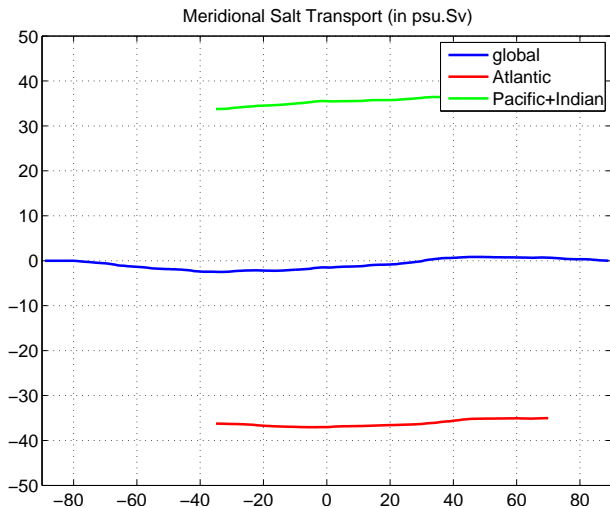

Figure : 1992-2011 mean – meridional salt transport (psu.Sv)



# meridional salt transport

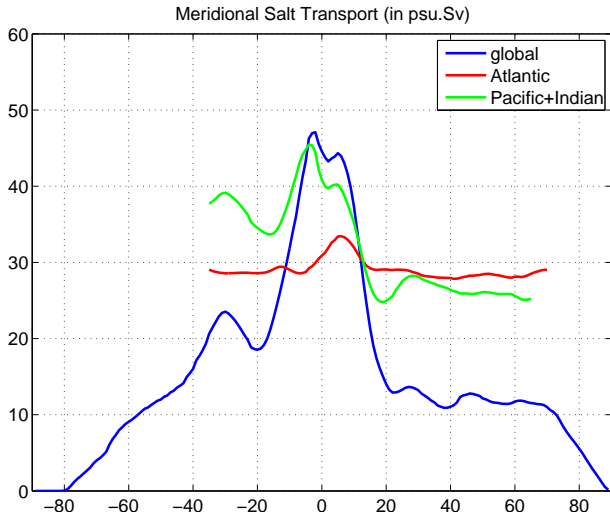

Figure : 1992-2011 standard deviation – meridional salt transport ( $\text{psu}\cdot\text{Sv}$ )

# meridional transports (time series)

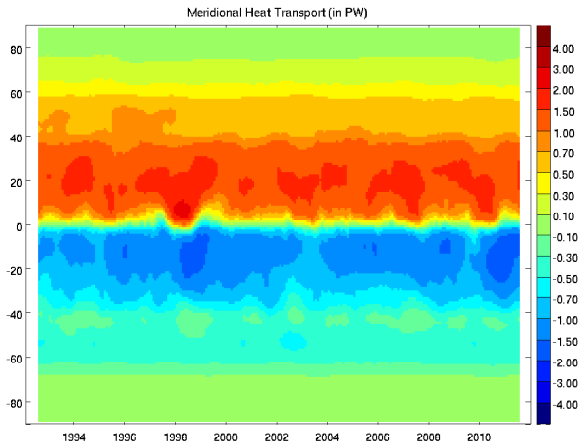

Figure : meridional heat transport (PW, annual mean)

# meridional transports (time series)

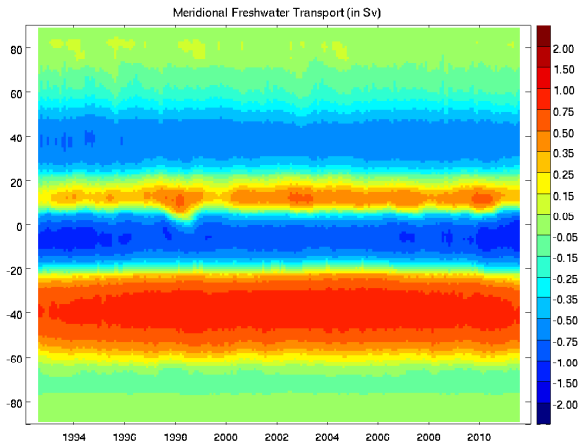

Figure : meridional freshwater transport (Sv, annual mean)

# meridional transports (time series)

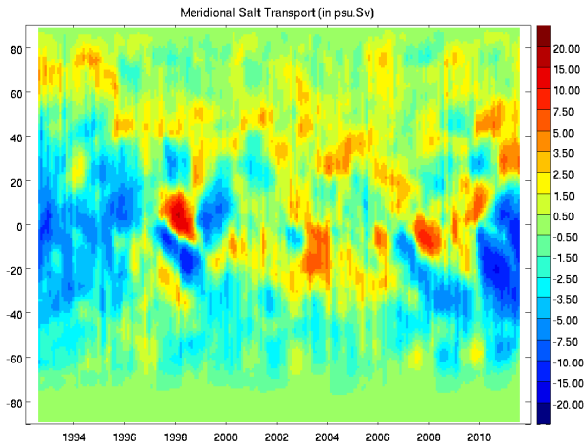

Figure : meridional salt transport ( $\text{psu.Sv}$ , annual mean)

# transects transport

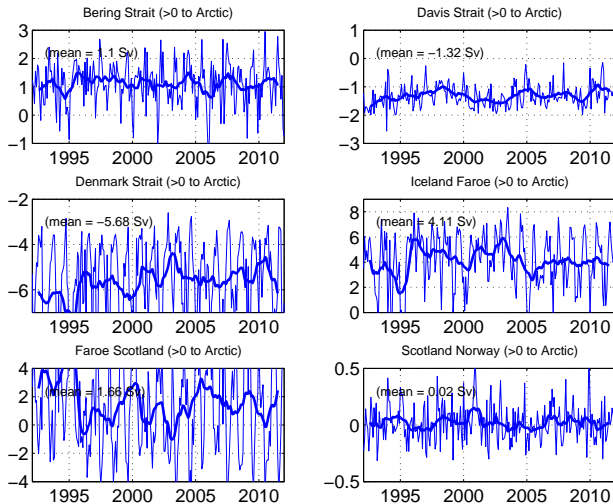

Figure : volume transports entering the Arctic (Sv, annual mean)

# transects transport

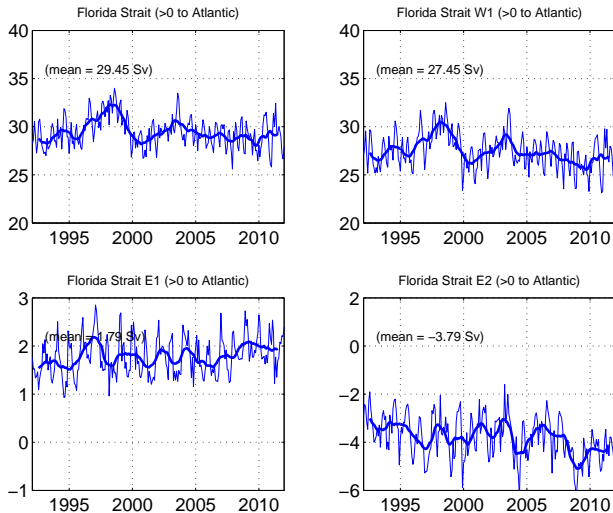

Figure : volume transports entering the Atlantic (Sv, annual mean)

# transects transport

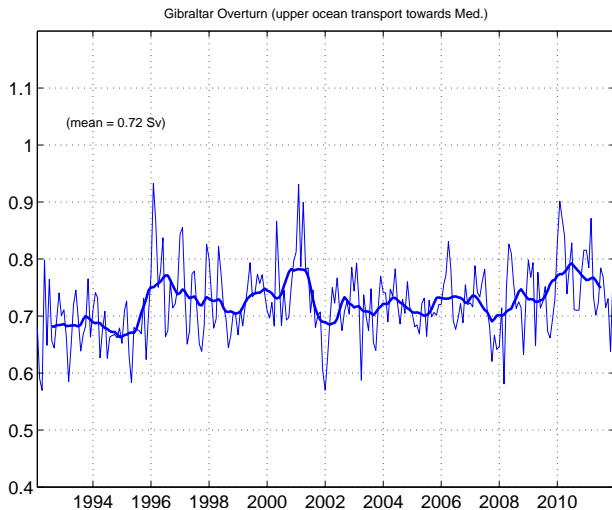

Figure : Gibraltar Overturn (Sv, annual mean)

# transects transport

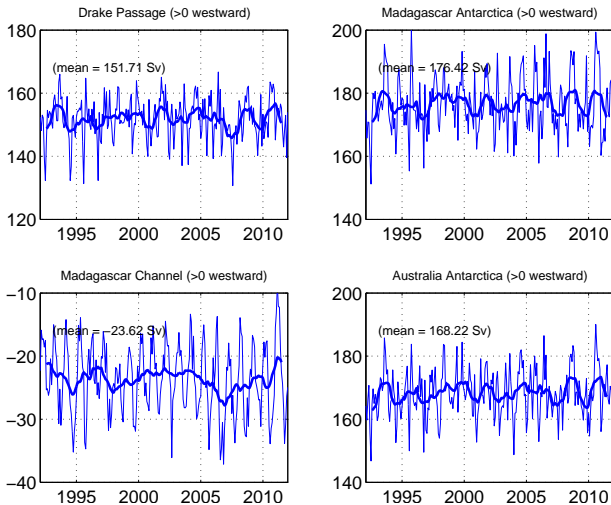

Figure : ACC volume transports (Sv, annual mean)



# transects transport

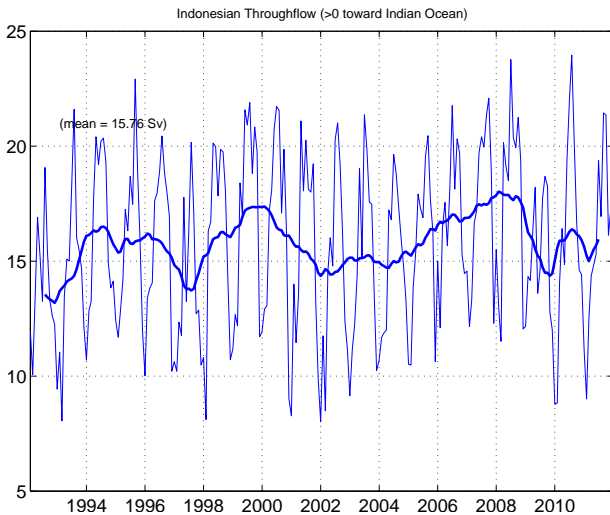

Figure : Indonesian Throughflow (Sv, annual mean)

# sea surface height

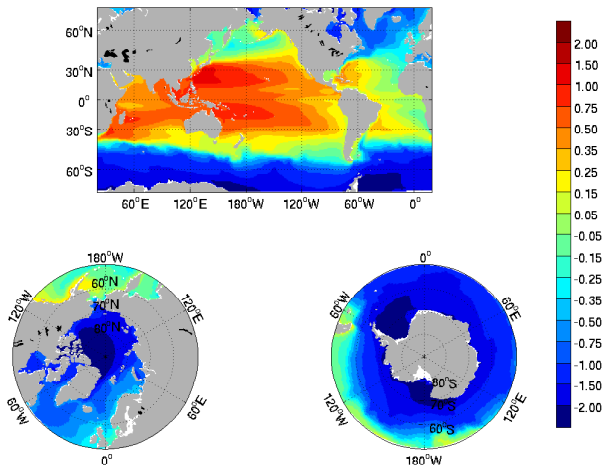

Figure : 1992-2011 mean – sea surface height (EXCLUDING ice, in m)

# sea surface height

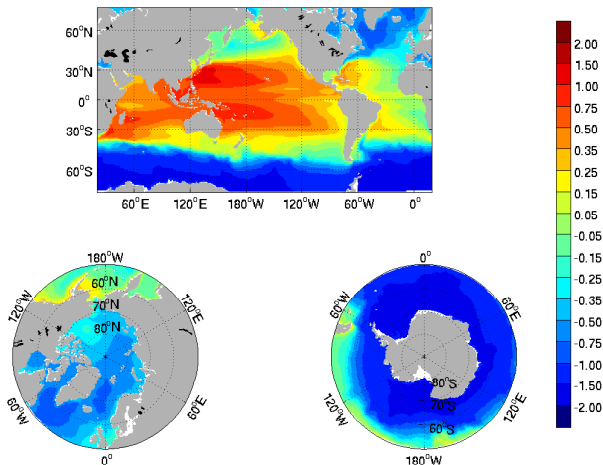

Figure : 1992-2011 mean – sea surface height (INCLUDING ice, in m)

# sea surface height

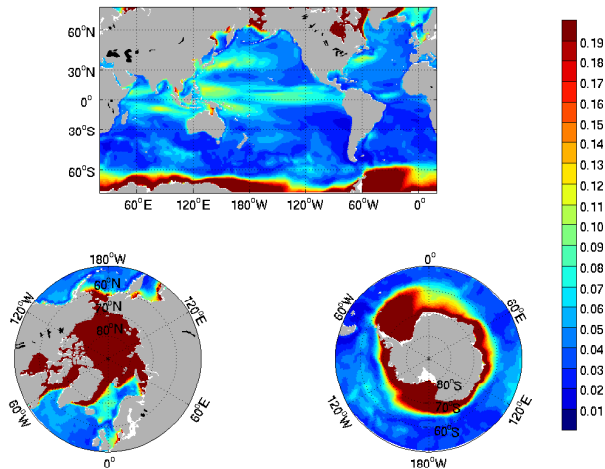

Figure : 1992-2011 standard deviation – sea surface height (EXCLUDING ice, in m)

# sea surface height

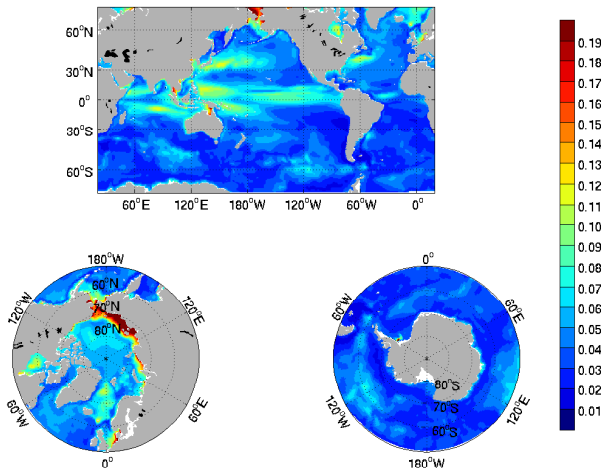

Figure : 1992-2011 standard deviation – sea surface height (INCLUDING ice, in m)

# 3D state variables

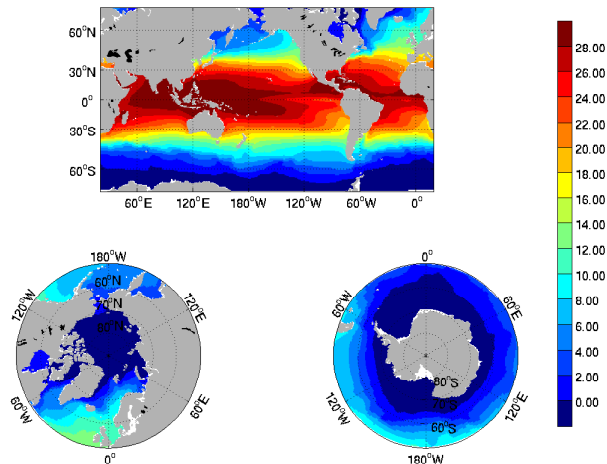

Figure : 1992-2011 mean – temperature (in degC) at 5m

# 3D state variables

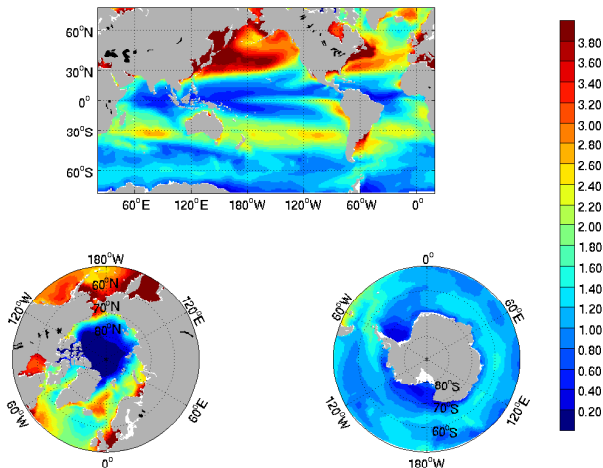

Figure : 1992-2011 standard deviation – temperature (in degC) at 5m

# 3D state variables

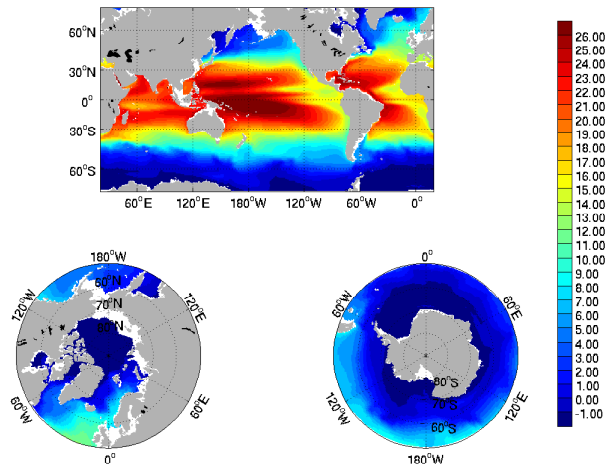

Figure : 1992-2011 mean – temperature (in degC) at 105m



# 3D state variables

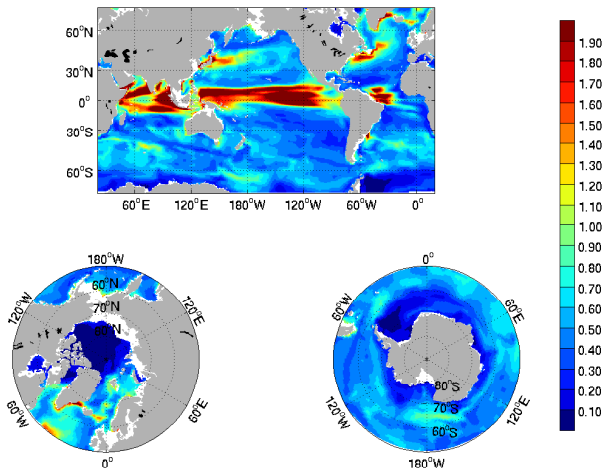

Figure : 1992-2011 standard deviation – temperature (in degC) at 105m

# 3D state variables

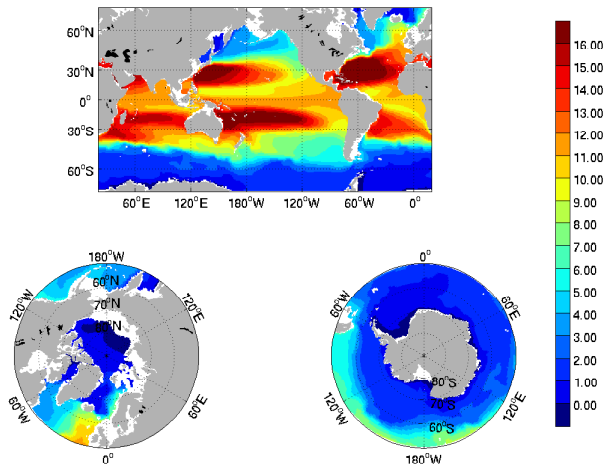

Figure : 1992-2011 mean – temperature (in degC) at 300m

# 3D state variables

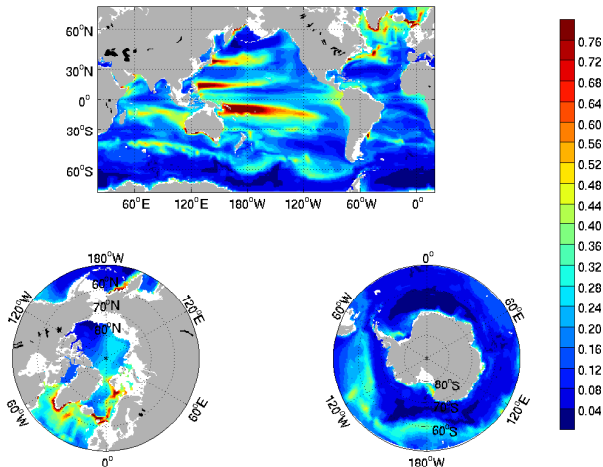

Figure : 1992-2011 standard deviation – temperature (in degC) at 300m

# 3D state variables

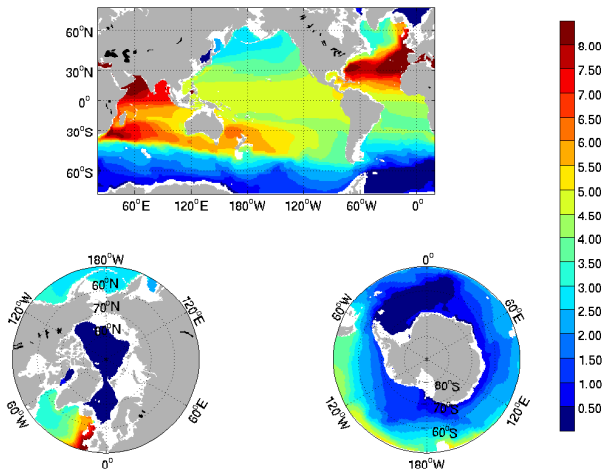

Figure : 1992-2011 mean – temperature (in degC) at 910m

# 3D state variables

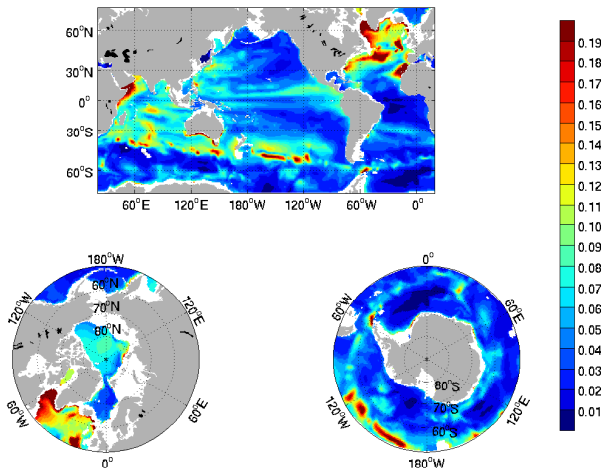

Figure : 1992-2011 standard deviation – temperature (in degC) at 910m

# 3D state variables

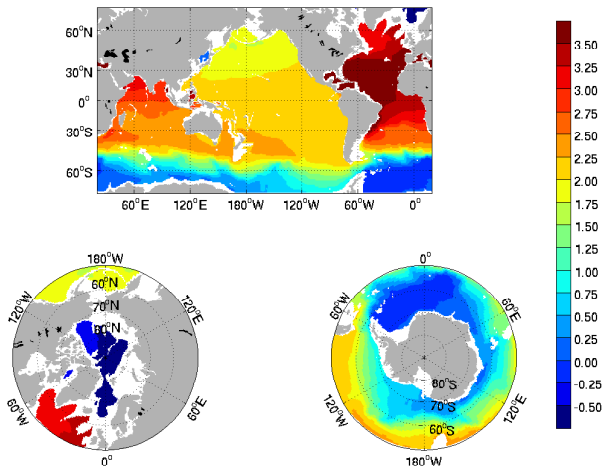

Figure : 1992-2011 mean – temperature (in degC) at 1914m

# 3D state variables

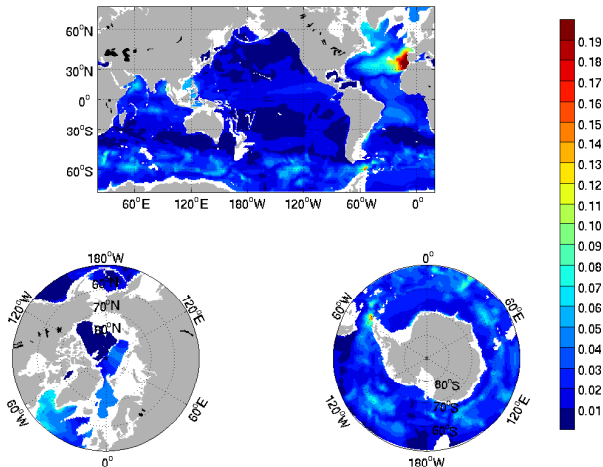

Figure : 1992-2011 standard deviation – temperature (in degC) at 1914m

# 3D state variables

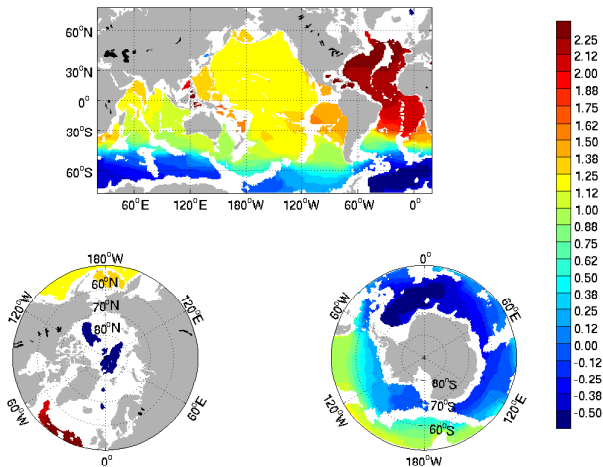

Figure : 1992-2011 mean – temperature (in degC) at 3581m



# 3D state variables

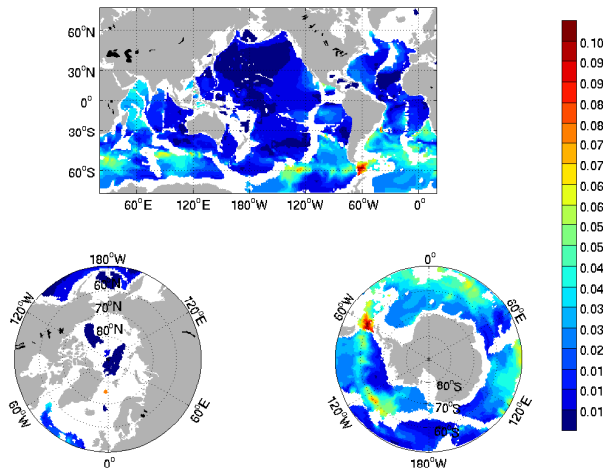

Figure : 1992-2011 standard deviation – temperature (in degC) at 3581m

# 3D state variables

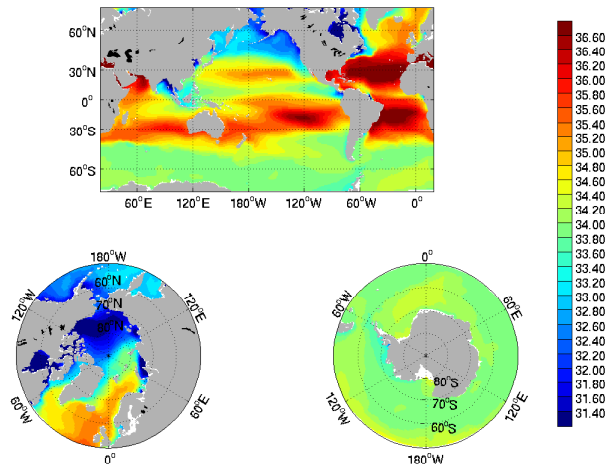

Figure : 1992-2011 mean – salinity (in psu) at 5m

# 3D state variables

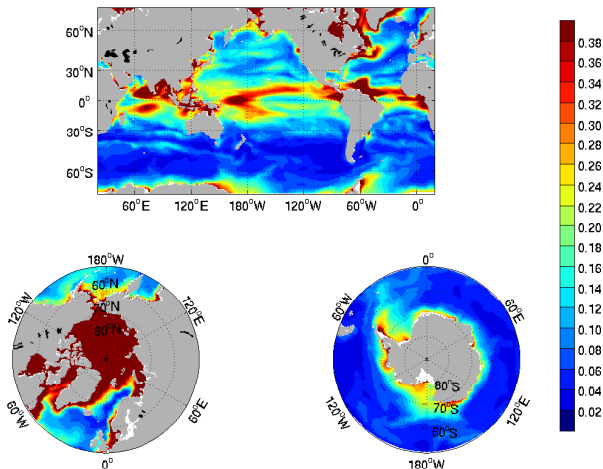

Figure : 1992-2011 standard deviation – salinity (in psu) at 5m

# 3D state variables

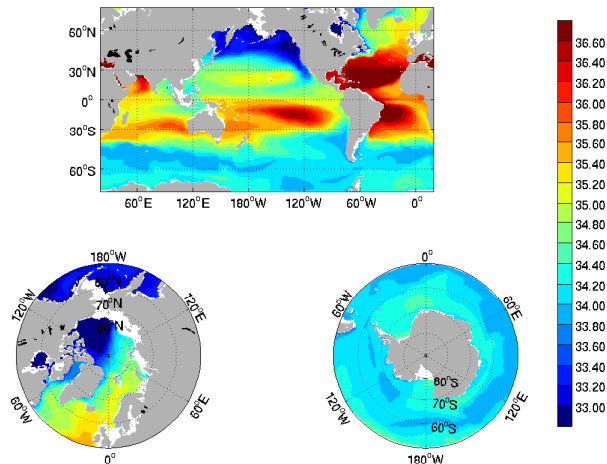

Figure : 1992-2011 mean – salinity (in psu) at 105m

# 3D state variables

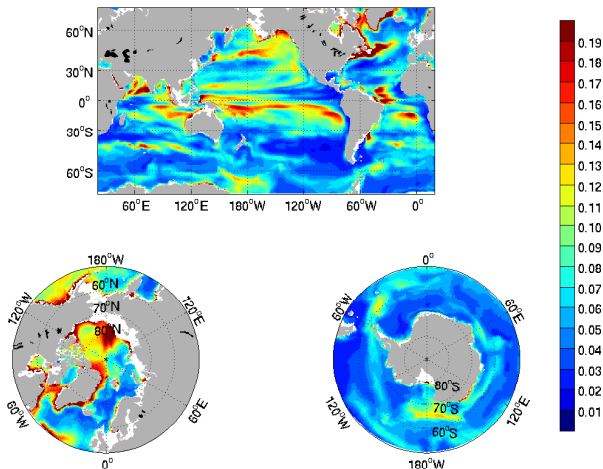

Figure : 1992-2011 standard deviation – salinity (in psu) at 105m

# 3D state variables

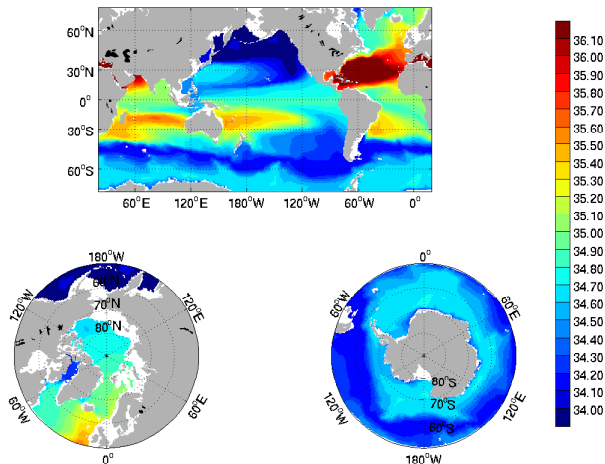

Figure : 1992-2011 mean – salinity (in psu) at 300m

# 3D state variables

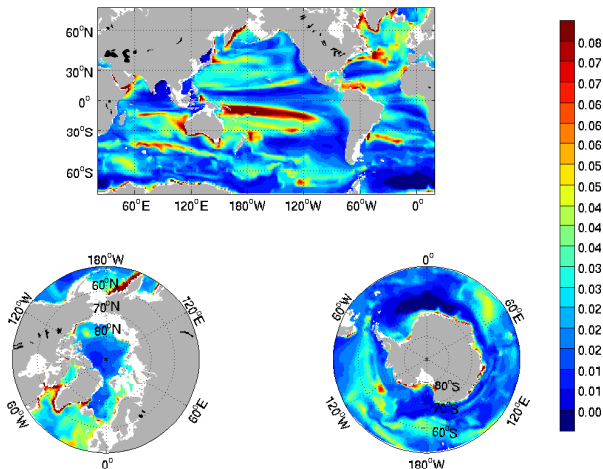

Figure : 1992-2011 standard deviation – salinity (in psu) at 300m

# 3D state variables

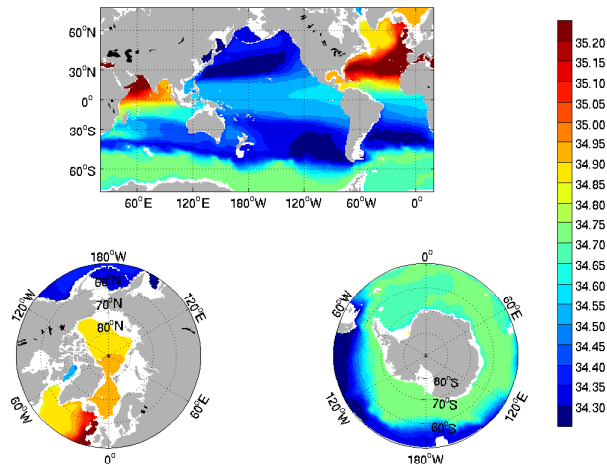

Figure : 1992-2011 mean – salinity (in psu) at 910m



# 3D state variables

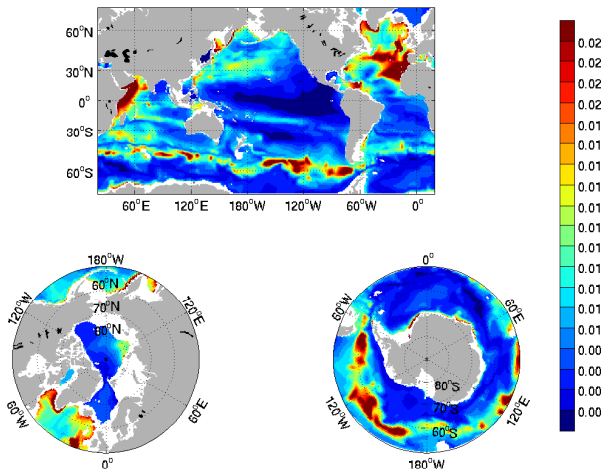

Figure : 1992-2011 standard deviation – salinity (in psu) at 910m

# 3D state variables

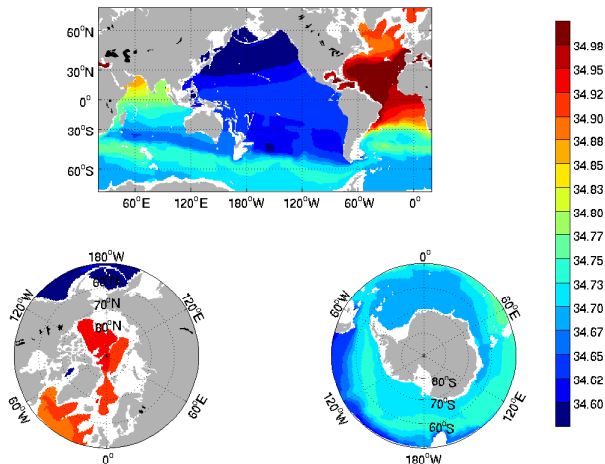

Figure : 1992-2011 mean – salinity (in psu) at 1914m

# 3D state variables

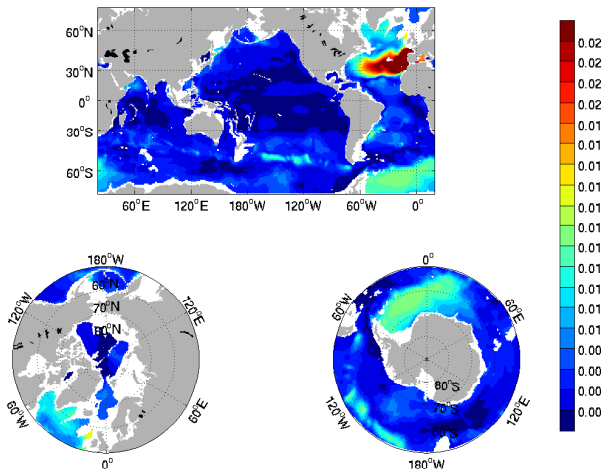

Figure : 1992-2011 standard deviation – salinity (in psu) at 1914m

# 3D state variables

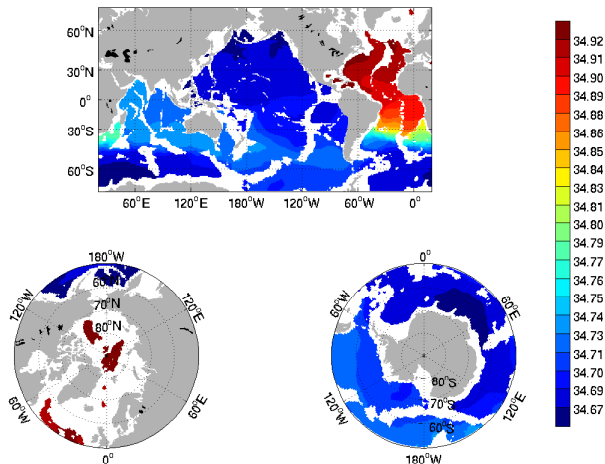

Figure : 1992-2011 mean – salinity (in psu) at 3581m

# 3D state variables

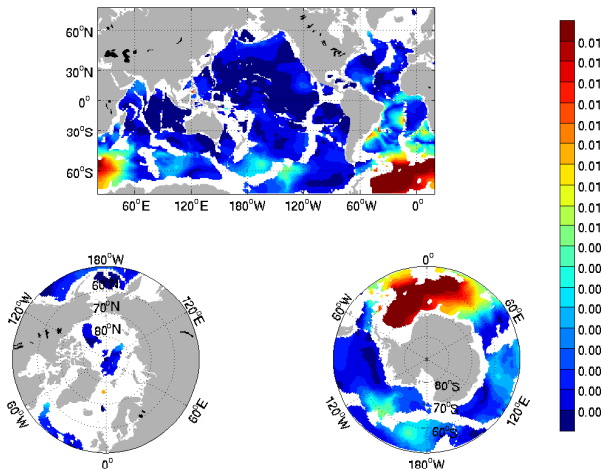

Figure : 1992-2011 standard deviation – salinity (in psu) at 3581m

# 3D state variables

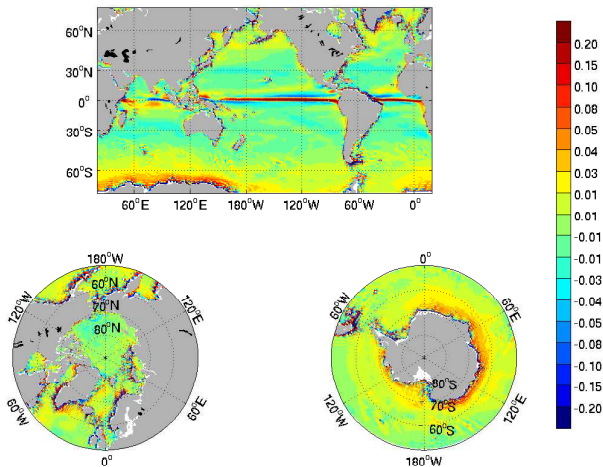

Figure : 1992-2011 mean – vertical velocity (in mm/year) at 15m

# 3D state variables

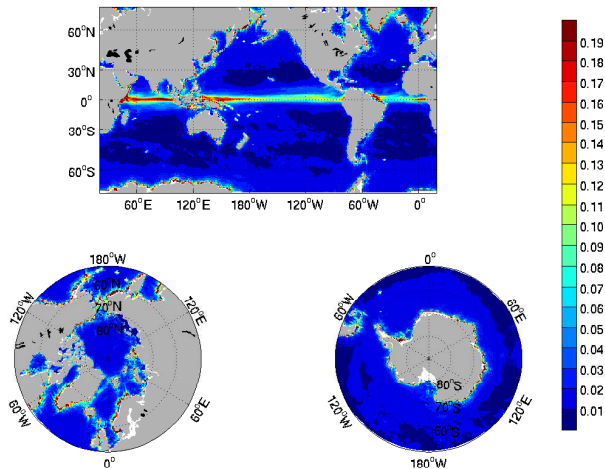

Figure : 1992-2011 standard deviation – vertical velocity (in mm/year) at 15m

# 3D state variables

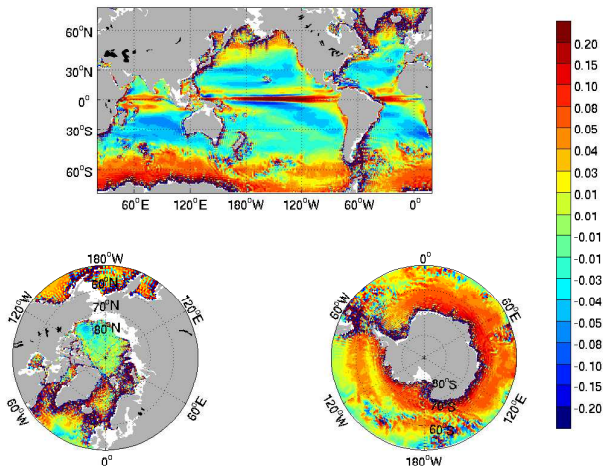

Figure : 1992-2011 mean – vertical velocity (in mm/year) at 105m



# 3D state variables

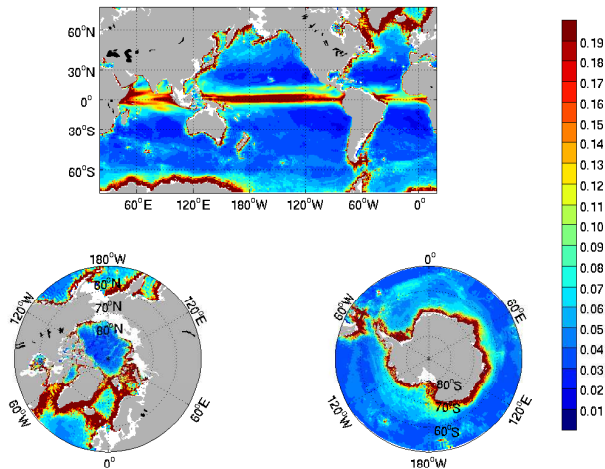

Figure : 1992-2011 standard deviation – vertical velocity (in mm/year) at 105m

# 3D state variables

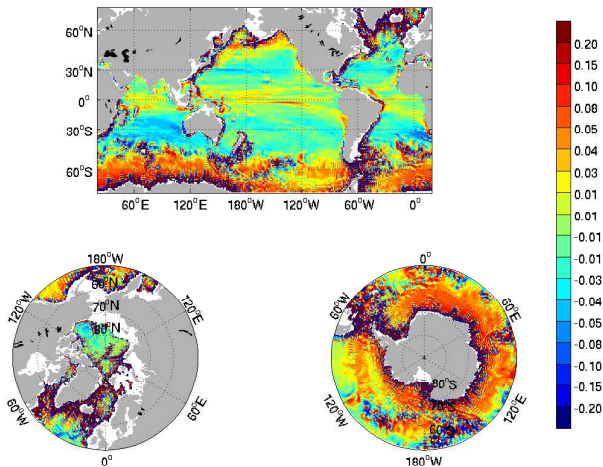

Figure : 1992-2011 mean – vertical velocity (in mm/year) at 300m

# 3D state variables

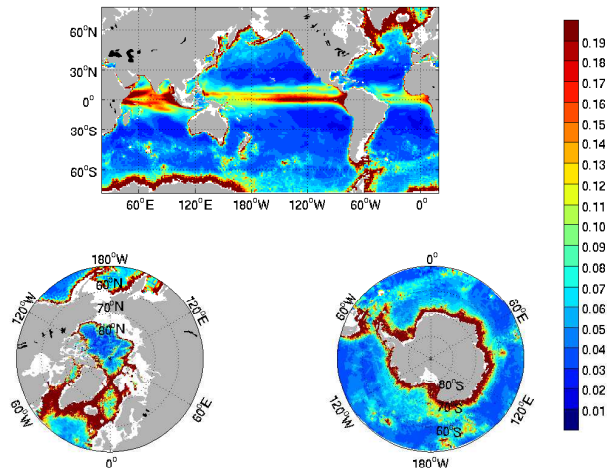

Figure : 1992-2011 standard deviation – vertical velocity (in mm/year) at 300m

# 3D state variables

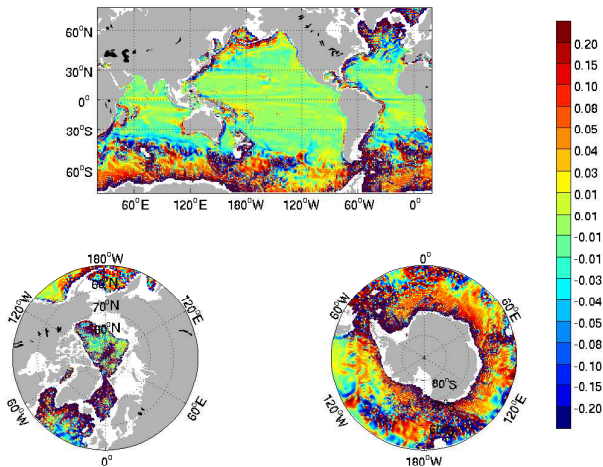

Figure : 1992-2011 mean – vertical velocity (in mm/year) at 910m

# 3D state variables

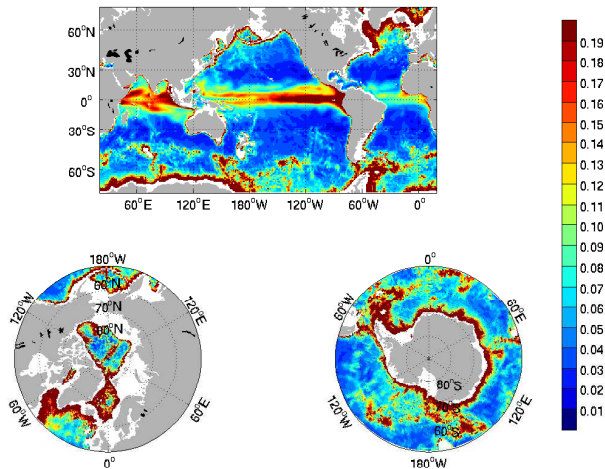

Figure : 1992-2011 standard deviation – vertical velocity (in mm/year) at 910m

# 3D state variables

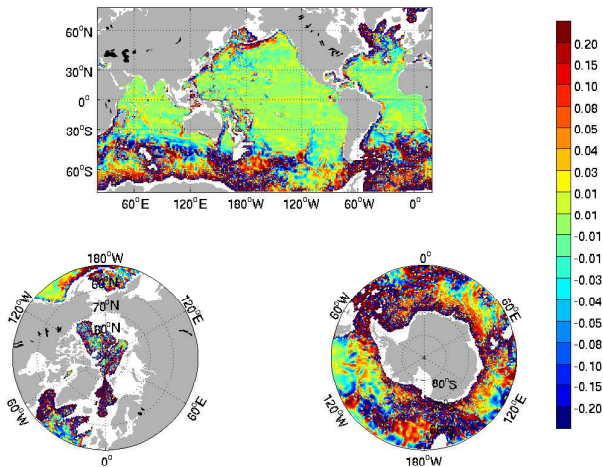

Figure : 1992-2011 mean – vertical velocity (in mm/year) at 1914m

# 3D state variables

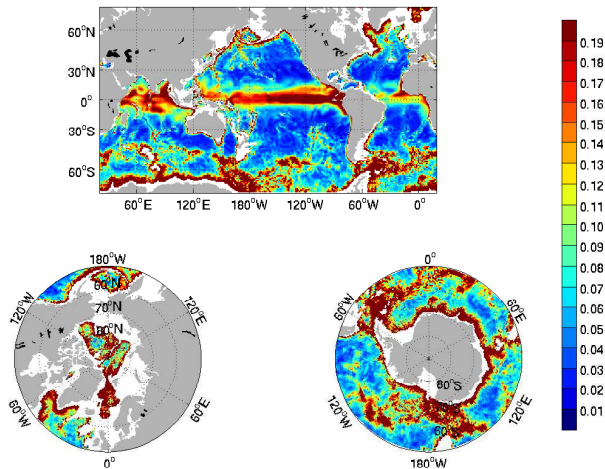

Figure : 1992-2011 standard deviation – vertical velocity (in mm/year) at 1914m

# 3D state variables

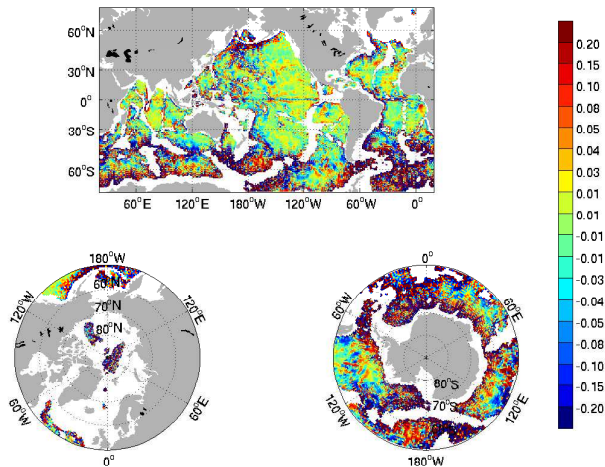

Figure : 1992-2011 mean – vertical velocity (in mm/year) at 3581m



# 3D state variables

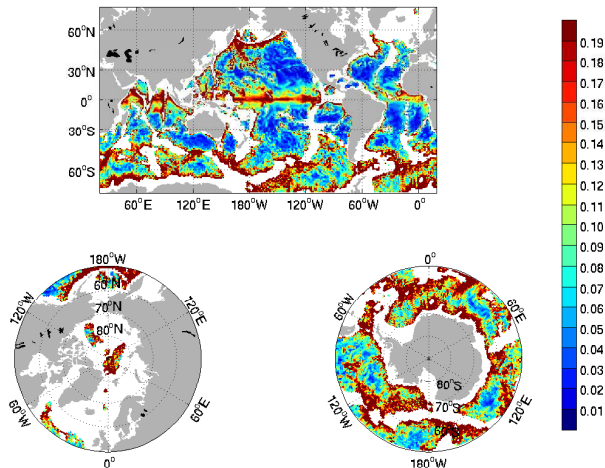

Figure : 1992-2011 standard deviation – vertical velocity (in mm/year) at 3581m

# air-sea heat flux

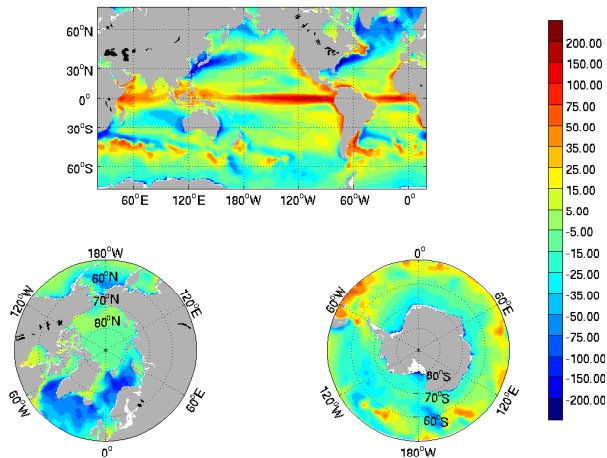

Figure : 1992-2011 mean – QNET to ocean+ice ( $\text{W/m}^2$ )

# air-sea heat flux

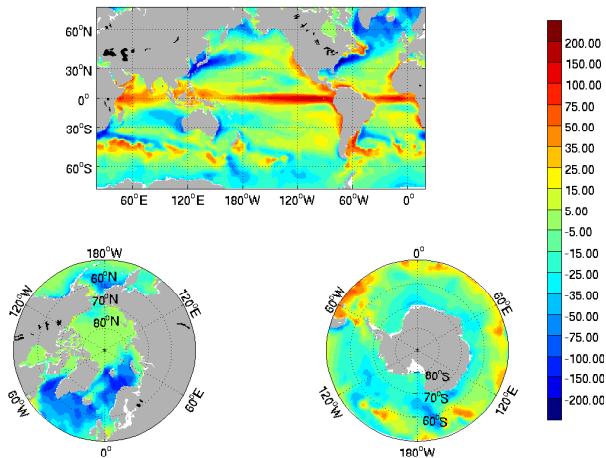

Figure : 1992-2011 mean – QNET to ocean ( $\text{W/m}^2$ )

# air-sea heat flux

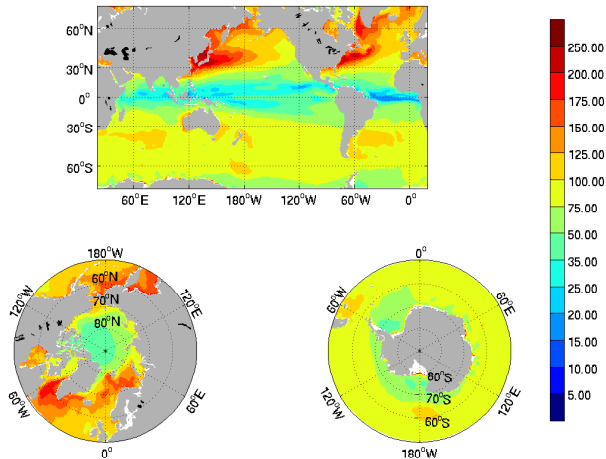

Figure : 1992-2011 standard deviation – QNET to ocean+ice ( $\text{W/m}^2$ )

# air-sea heat flux

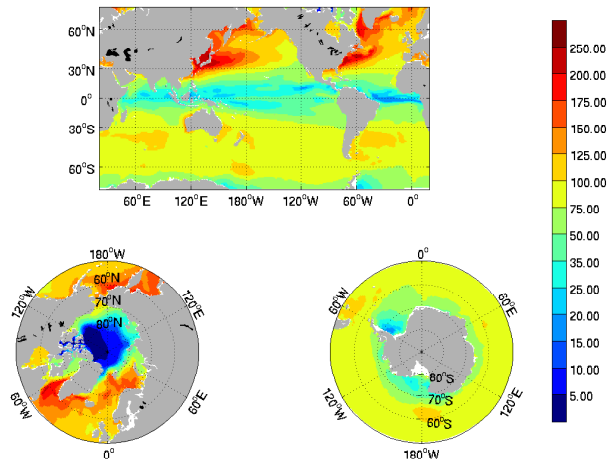

Figure : 1992-2011 standard deviation – QNET to ocean ( $\text{W/m}^2$ )

# air-sea freshwater flux

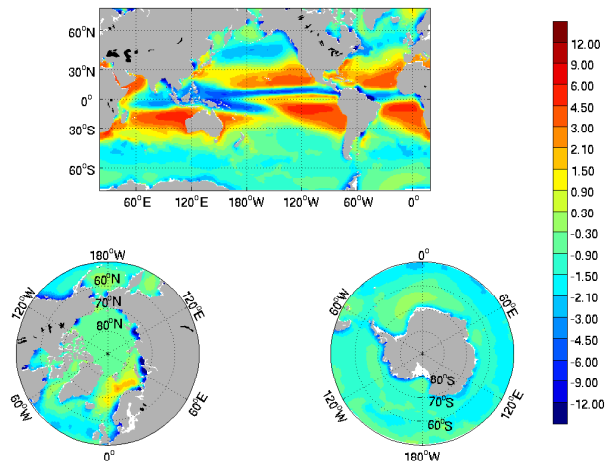

Figure : 1992-2011 mean – E-P-R from ocean+ice (mm/day)

# air-sea freshwater flux

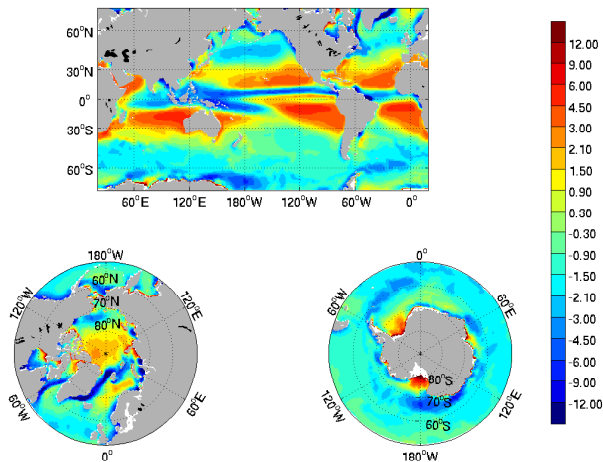

Figure : 1992-2011 mean – E-P-R from ocean (mm/day)

# air-sea freshwater flux

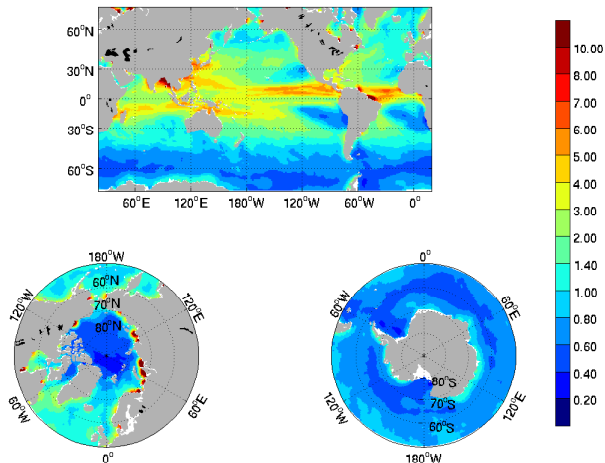

Figure : 1992-2011 standard deviation – E-P-R to ocean+ice ( $\text{W/m}^2$ )



# air-sea freshwater flux

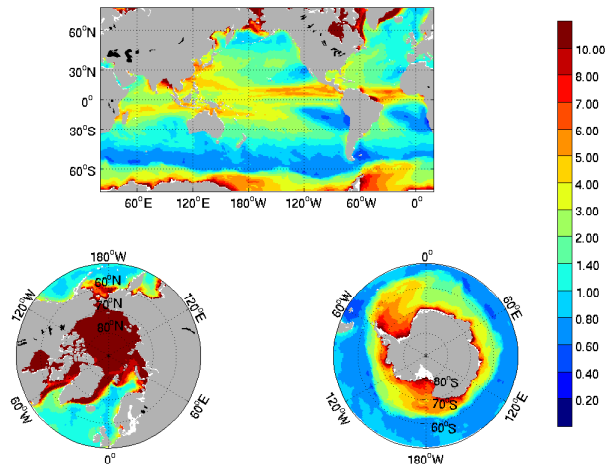

Figure : 1992-2011 standard deviation – E-P-R to ocean ( $\text{W/m}^2$ )

# surface wind stress

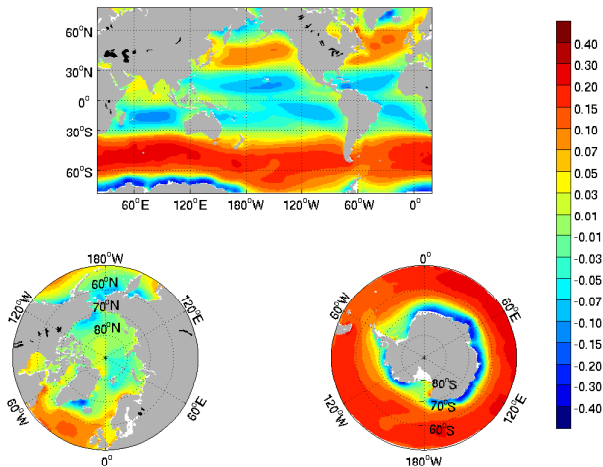

Figure : 1992-2011 mean – zonal wind stress ( $\text{N/m}^2$ )

# surface wind stress

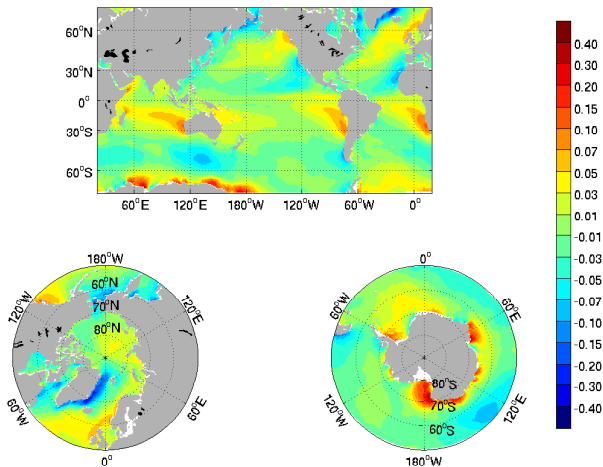

Figure : 1992-2011 mean – meridional wind stress ( $\text{N/m}^2$ )

# surface wind stress

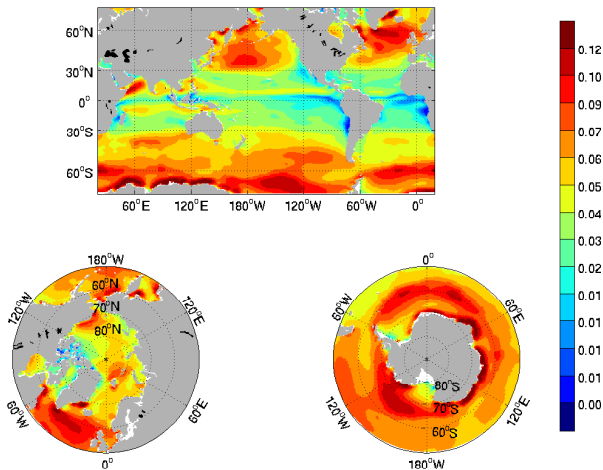

Figure : 1992-2011 standard deviation –  $\tau_Z$  ( $\text{W/m}^2$ )

# surface wind stress

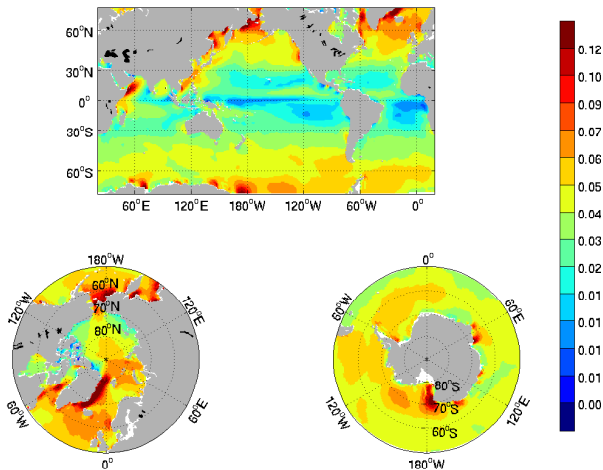

Figure : 1992-2011 standard deviation –  $\tau_M$  ( $\text{W/m}^2$ )

# zonal mean tendencies

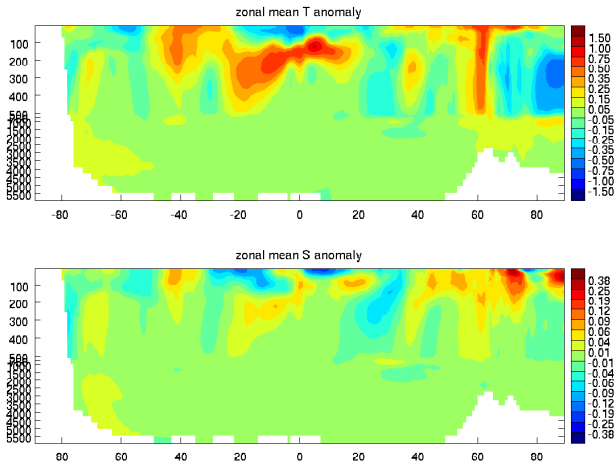

Figure : 1992-2011 , last year minus first year – zonal mean temperature (degC; top) and salinity (psu; bottom)

# equatorial sections

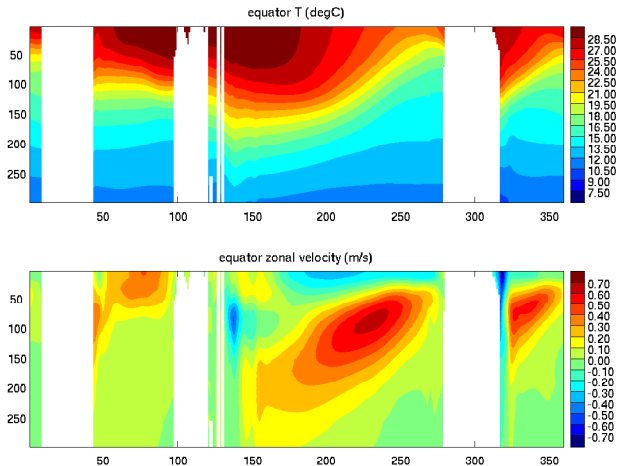

Figure : 1992-2011 mean – equator temperature (degC;top) and zonal velocity (m/s;bottom)

# global mean properties

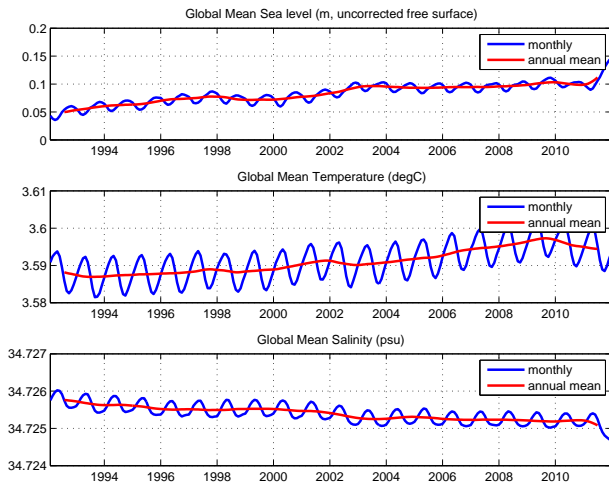

Figure : global mean T (degC; top) and S (psu; bottom)



# global mean properties

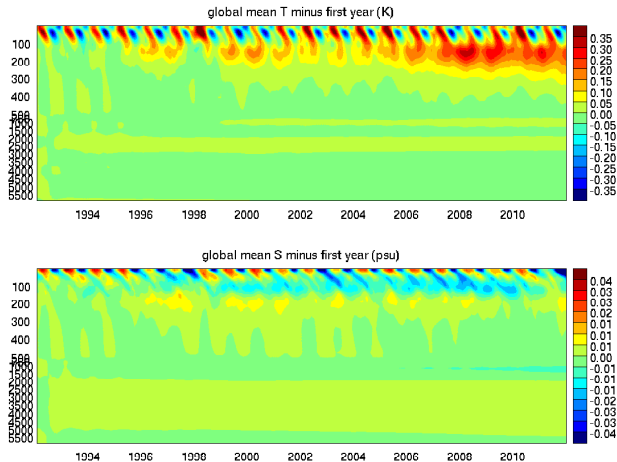

Figure : global mean temperature (K; top) and salinity (psu; bottom) minus first year

# zonal mean properties

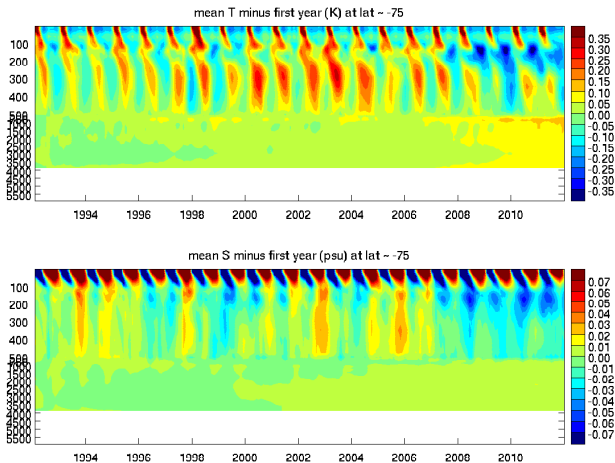

Figure : mean temperature (top; K) and salinity (bottom; psu) minus first year at lat  $\approx -75$

# zonal mean properties

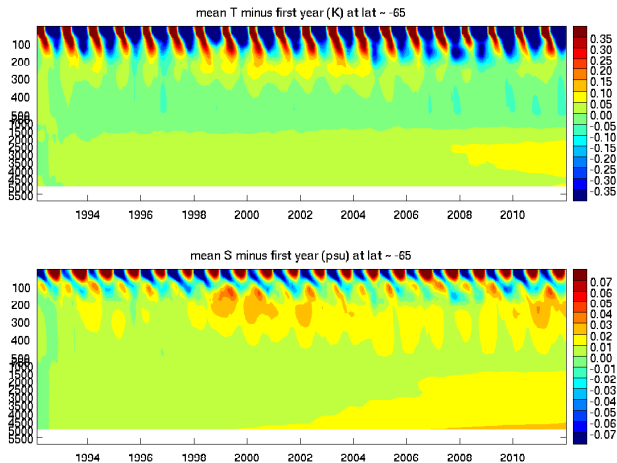

Figure : mean temperature (top; K) and salinity (bottom; psu) minus first year at lat  $\approx -65$

# zonal mean properties

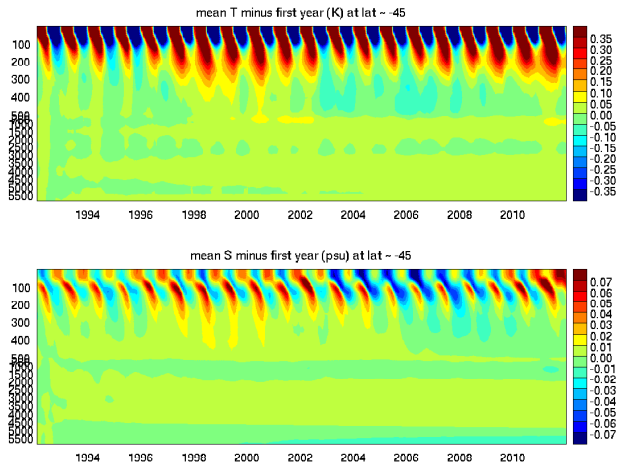

Figure : mean temperature (top; K) and salinity (bottom; psu) minus first year at lat  $\approx$  -45

# zonal mean properties

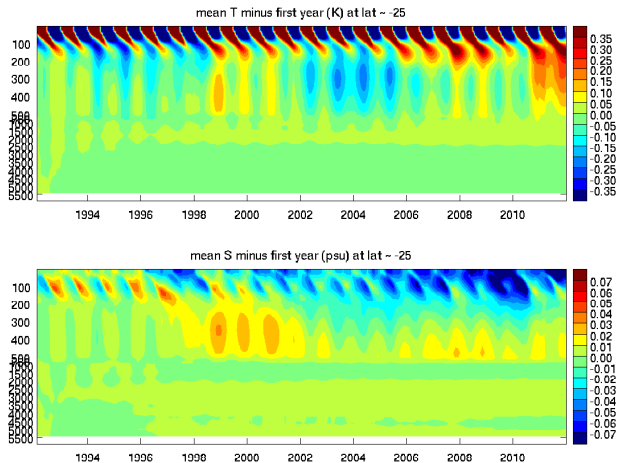

Figure : mean temperature (top; K) and salinity (bottom; psu) minus first year at lat  $\approx -25$

# zonal mean properties

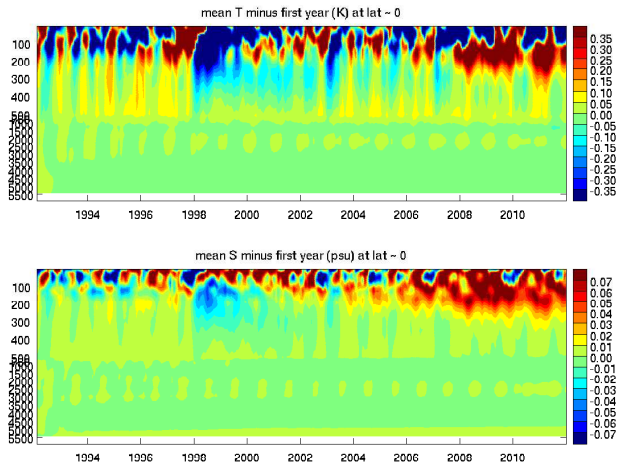

Figure : mean temperature (top; K) and salinity (bottom; psu) minus first year at lat  $\approx 0$

# zonal mean properties

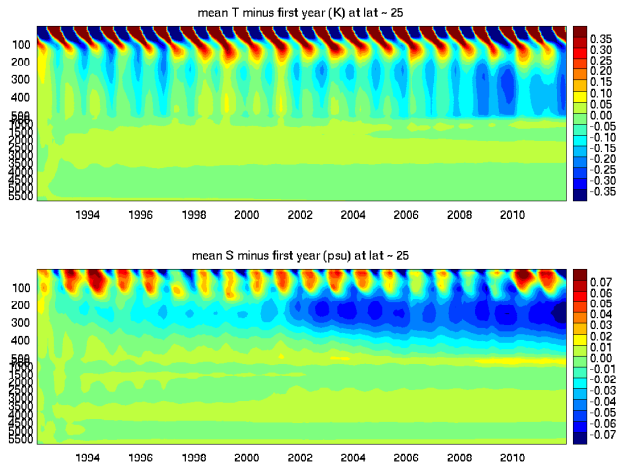

Figure : mean temperature (top; K) and salinity (bottom; psu) minus first year at lat  $\approx 25$

# zonal mean properties

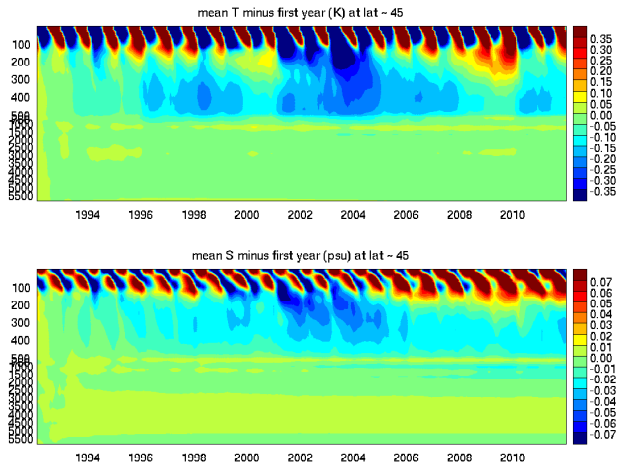

Figure : mean temperature (top; K) and salinity (bottom; psu) minus first year at lat  $\approx 45$



# zonal mean properties

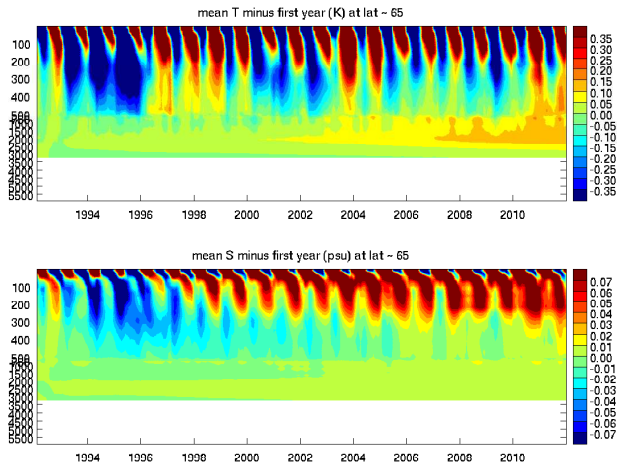

Figure : mean temperature (top; K) and salinity (bottom; psu) minus first year at lat  $\approx 65$

# zonal mean properties

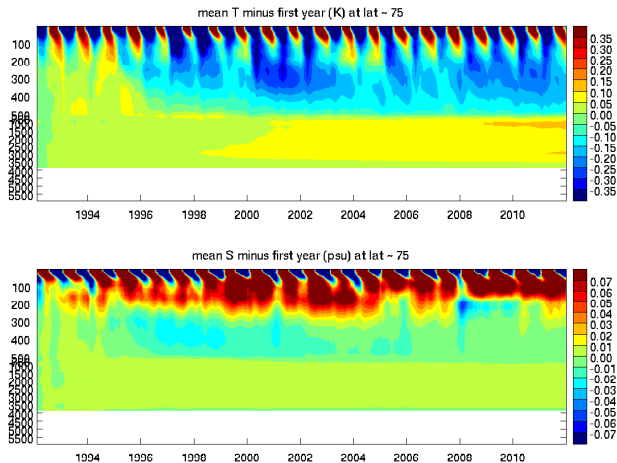

Figure : mean temperature (top; K) and salinity (bottom; psu) minus first year at lat  $\approx 75$

# zonal mean properties (surface)

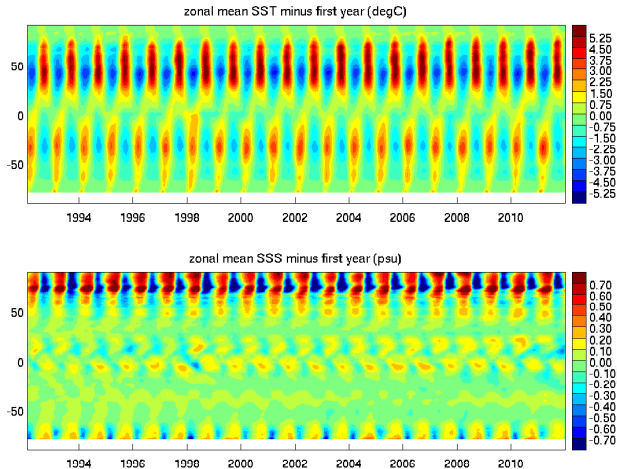

Figure : zonal mean temperature (degC; top) and salinity (psu; bottom) minus first year (psu) at 5m depth

# zonal mean properties (surface)

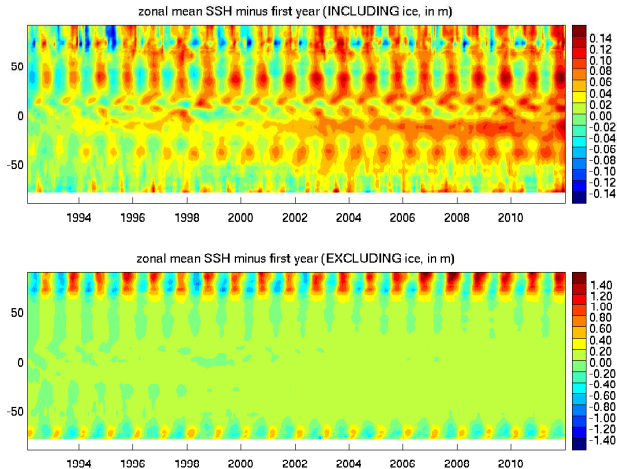

Figure : zonal mean SSH (m, uncorrected free surface) minus first year, including ice (top) and below ice (bottom)

# zonal mean properties (surface)

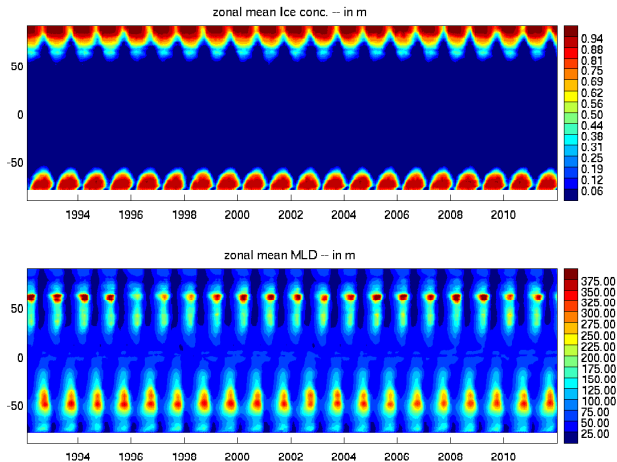

Figure : zonal mean ice concentration (no units) and mixed layer depth (m)

# seaice time series

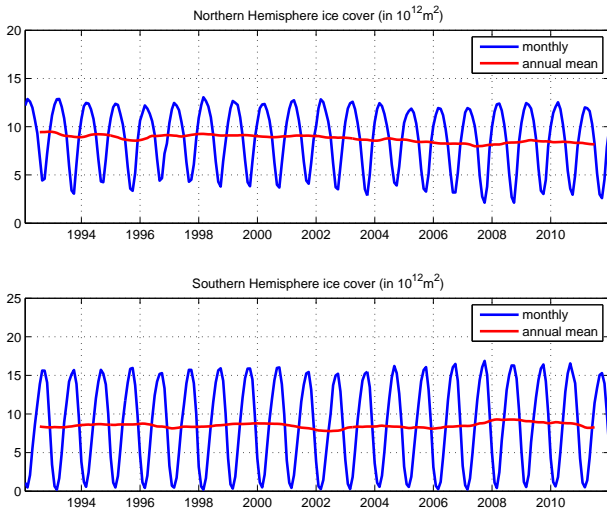

Figure : sea ice cover (in  $10^{12}m^2$ ) in northern (top) and southern (bottom) hemisphere

# seaice time series

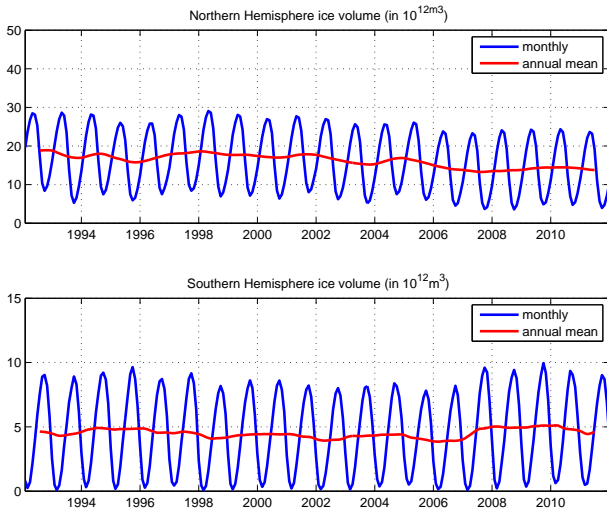

Figure : sea ice volume (in  $10^{12}m^3$ ) in northern (top) and southern (bottom) hemisphere

# seaice time series

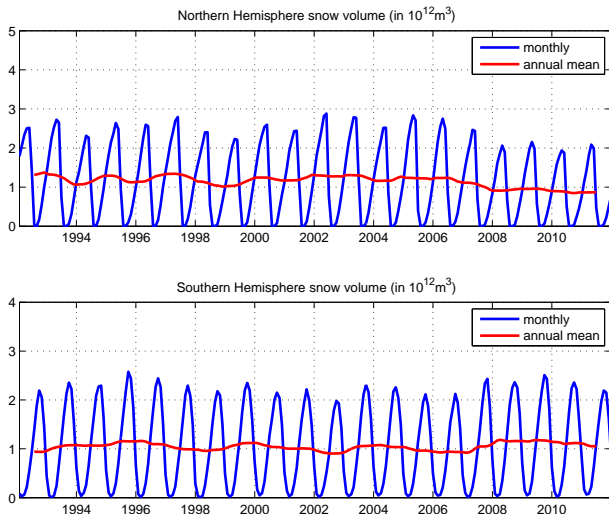

Figure : snow volume (in  $10^{12}m^3$ ) in northern (top) and southern (bottom) hemisphere



# seaice time series

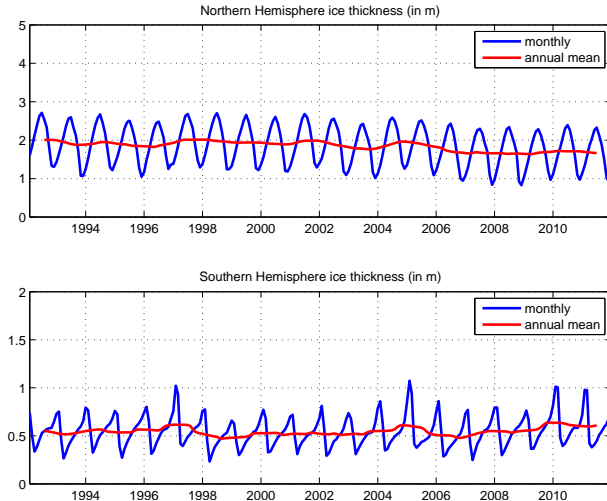

Figure : sea ice thickness (in m) in northern (top) and southern (bottom) hemisphere

# seaice time series

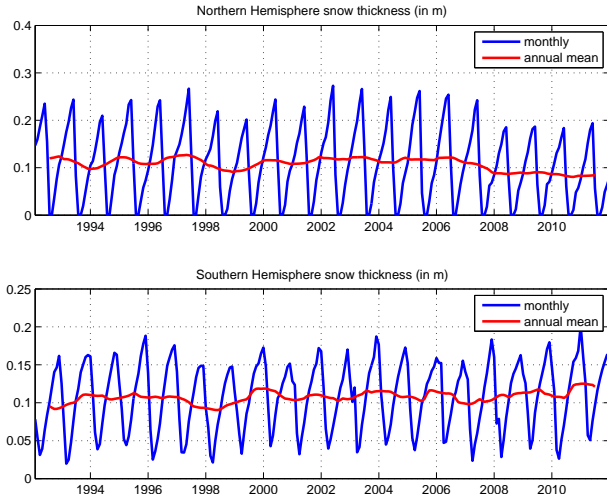

Figure : snow thickness (in m) in northern (top) and southern (bottom) hemisphere

# budgets : volume, heat and salt (top to bottom)

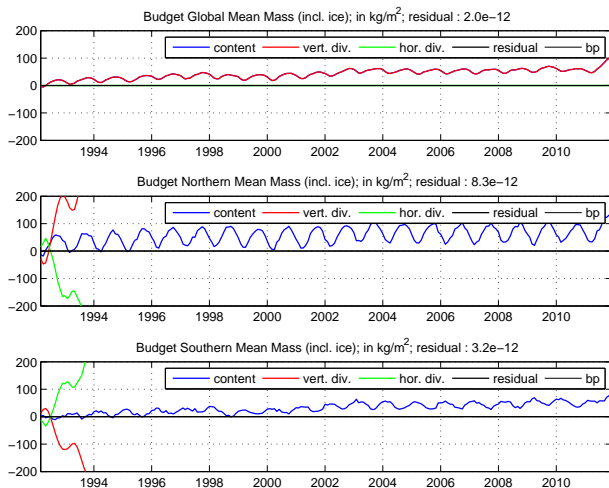

Figure : 1992-2011 global (upper) north (mid) and south (lower), mass budget (ocean+ice) in  $\text{kg/m}^2$ .

# budgets : volume, heat and salt (top to bottom)

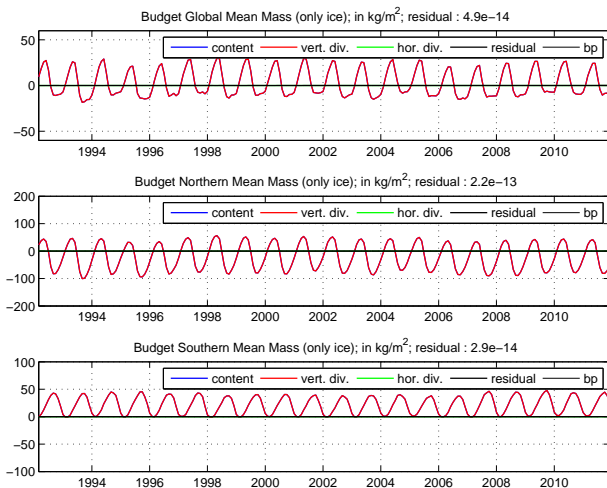

Figure : 1992-2011 global (upper) north (mid) and south (lower), mass budget (ice only) in  $\text{kg/m}^2$ .

# budgets : volume, heat and salt (top to bottom)

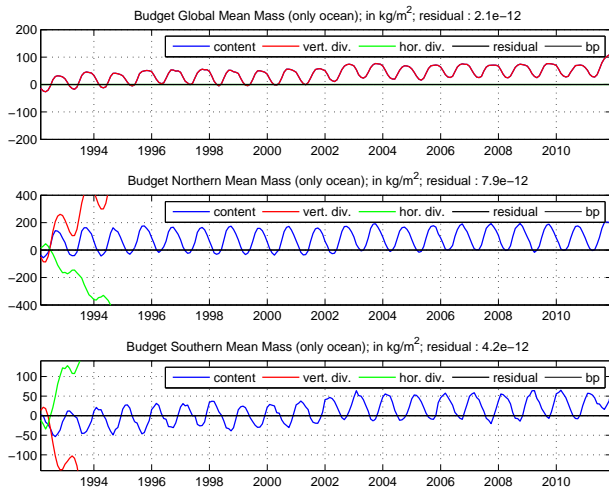

Figure : 1992-2011 global (upper) north (mid) and south (lower), mass budget (ocean only) in  $\text{kg/m}^2$ .

# budgets : volume, heat and salt (top to bottom)

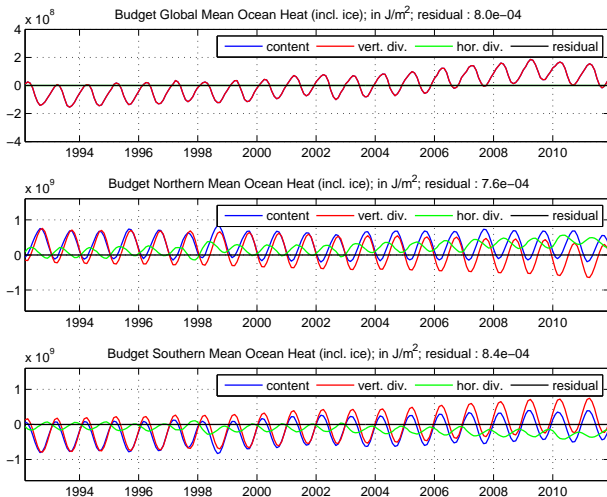

Figure : 1992-2011 global (upper) north (mid) and south (lower), heat budget (ocean+ice) in  $\text{J/m}^2$ .

# budgets : volume, heat and salt (top to bottom)

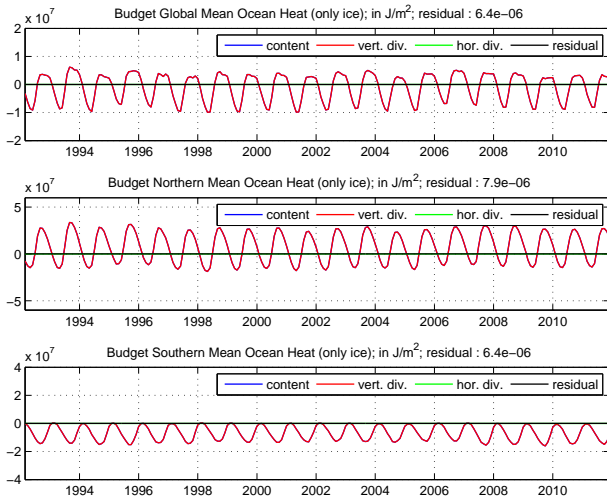

Figure : 1992-2011 global (upper) north (mid) and south (lower), heat budget (ice only) in  $\text{J/m}^2$ .

# budgets : volume, heat and salt (top to bottom)

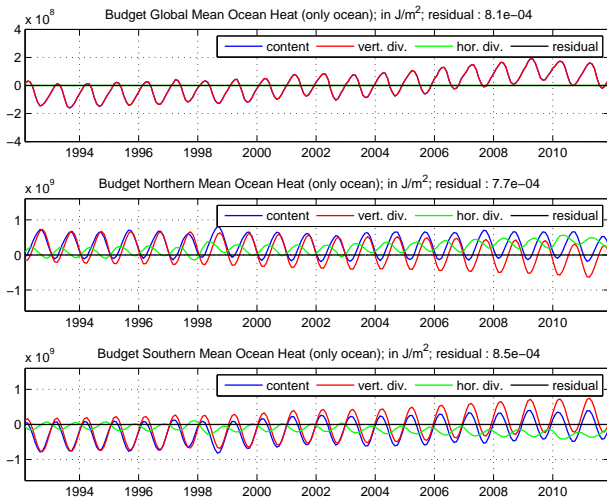

Figure : 1992-2011 global (upper) north (mid) and south (lower), heat budget (ocean only) in  $\text{J/m}^2$ .



# budgets : volume, heat and salt (top to bottom)

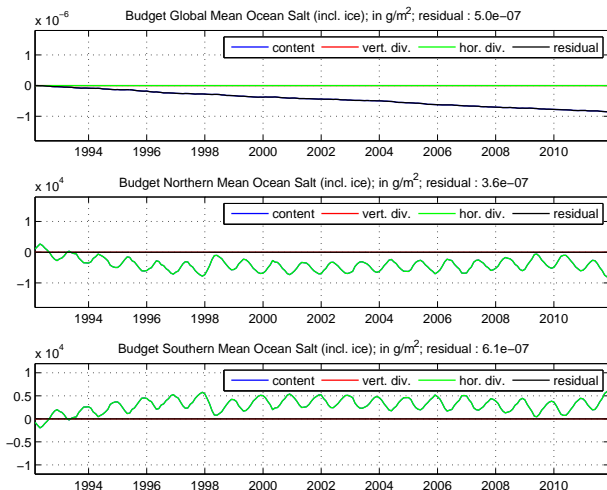

Figure : 1992-2011 global (upper) north (mid) and south (lower), salt budget (ocean+ice) in  $\text{g/m}^2$ .

# budgets : volume, heat and salt (top to bottom)

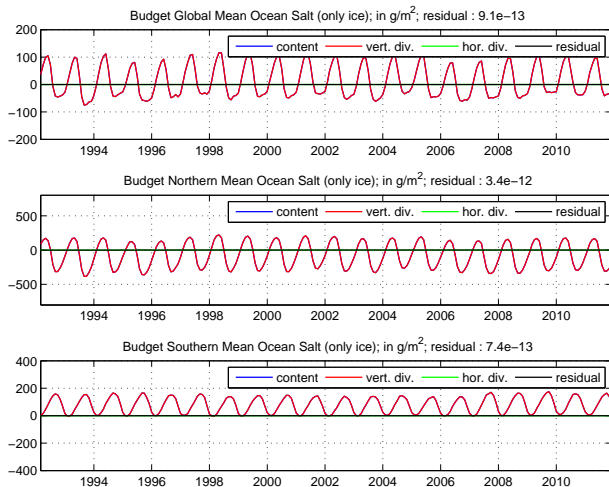

Figure : 1992-2011 global (upper) north (mid) and south (lower), salt budget (ice only) in  $\text{g/m}^2$ .

# budgets : volume, heat and salt (top to bottom)

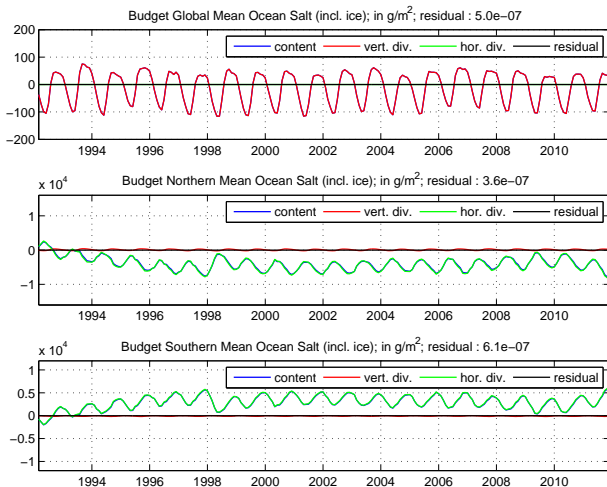

Figure : 1992-2011 global (upper) north (mid) and south (lower), salt budget (ocean only) in  $\text{g/m}^2$ .

# budgets : volume, heat and salt (100m to bottom)

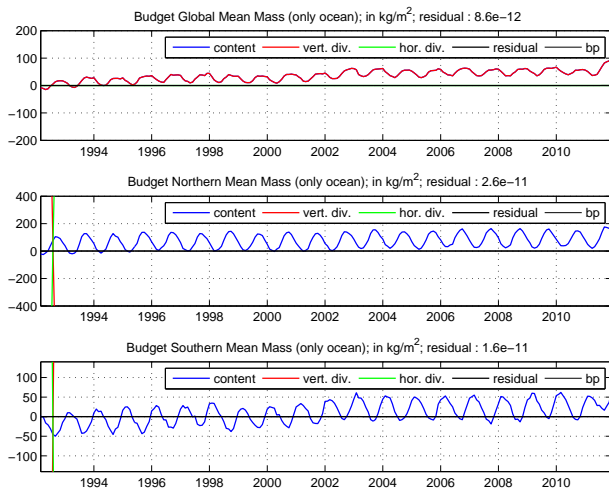

Figure : 1992-2011 global (upper) north (mid) and south (lower), mass budget (ocean only) in  $\text{kg/m}^2$ .

# budgets : volume, heat and salt (100m to bottom)

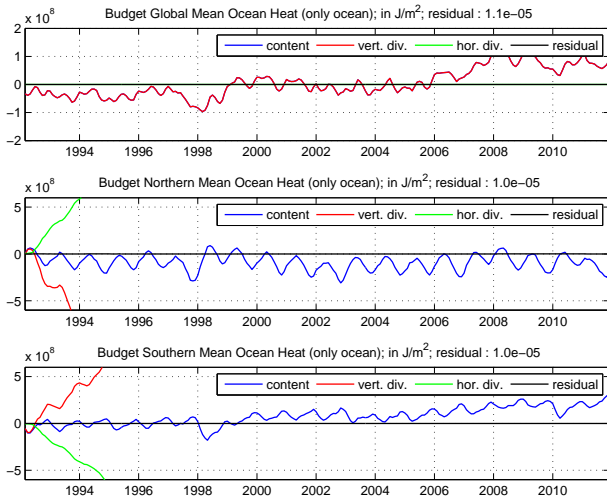

Figure : 1992-2011 global (upper) north (mid) and south (lower), heat budget (ocean only) in J/m<sup>2</sup>.

# budgets : volume, heat and salt (100m to bottom)

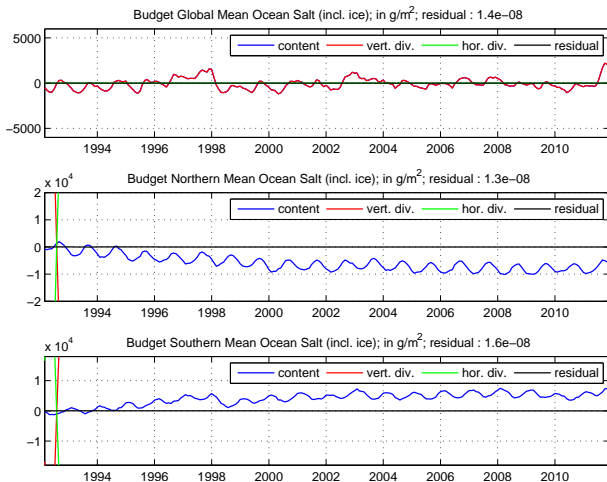

Figure : 1992-2011 global (upper) north (mid) and south (lower), salt budget (ocean only) in  $\text{g/m}^2$ .

# mixed layer depth fields

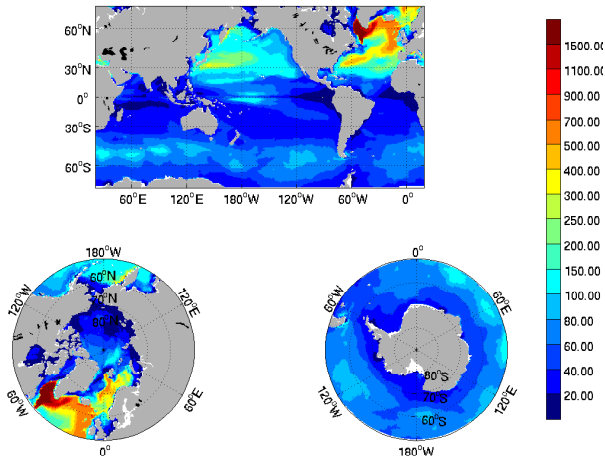

Figure : 1992-2011 March mean – mixed layer depth per Kara formula (m)

# mixed layer depth fields

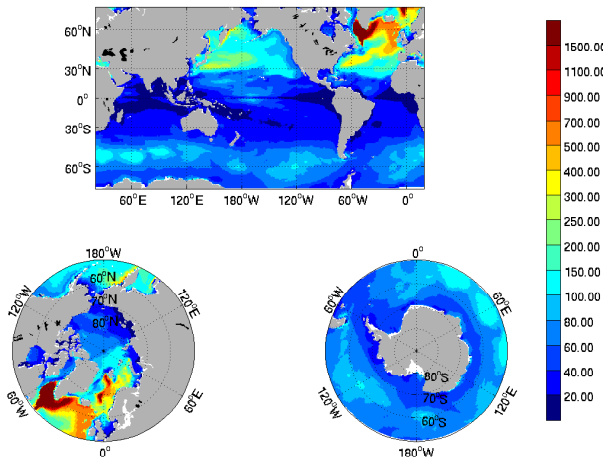

Figure : 1992-2011 March mean – mixed layer depth per Suga formula (m)



# mixed layer depth fields

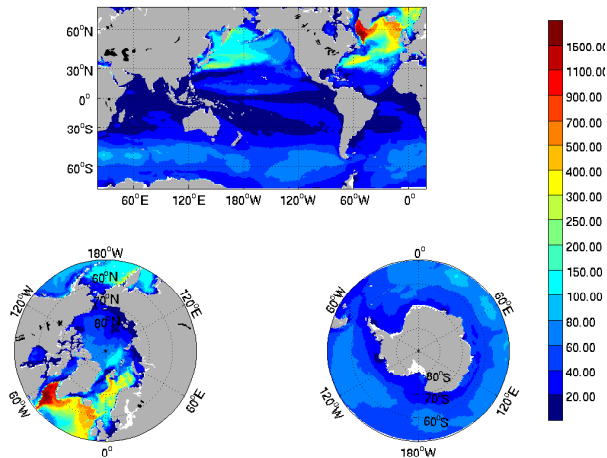

Figure : 1992-2011 March mean – mixed layer depth per Boyer M. formula (m)

# mixed layer depth fields

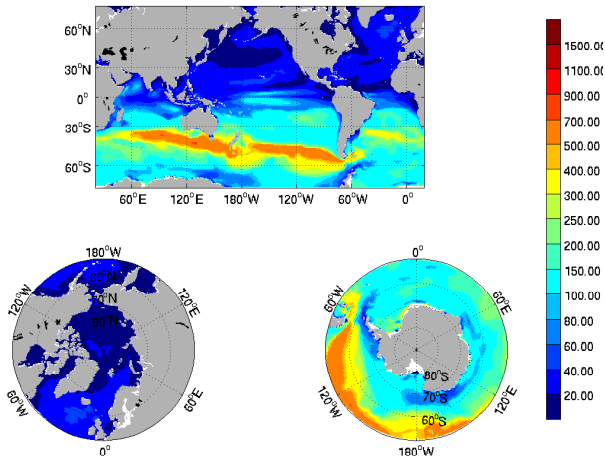

Figure : 1992-2011 September mean – mixed layer depth per Kara formula (m)

# mixed layer depth fields

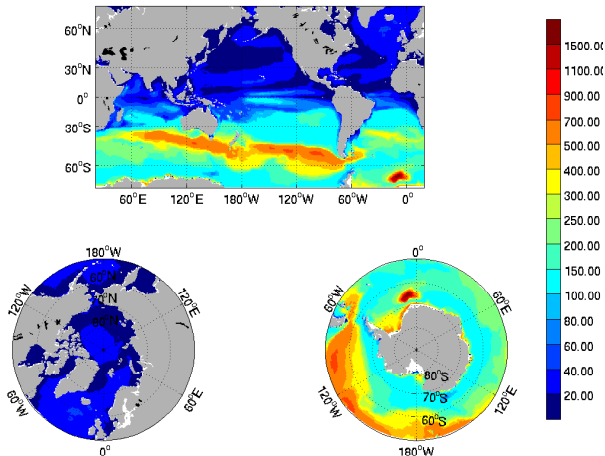

Figure : 1992-2011 September mean – mixed layer depth per Suga formula (m)

# mixed layer depth fields

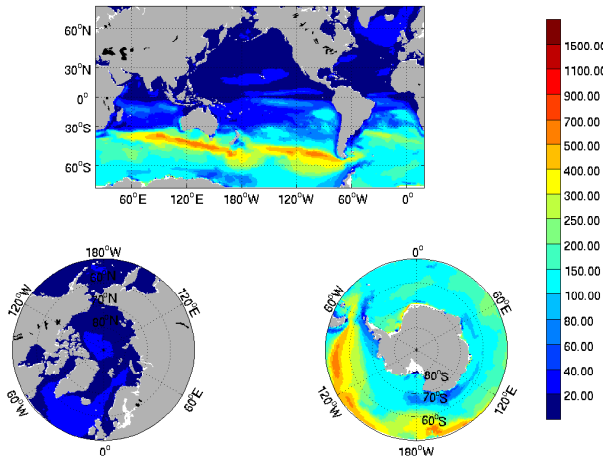

Figure : 1992-2011 September mean – mixed layer depth per Boyer M. formula (m)
